# Supplementary material
Source: publisher site journal article supplement (http://edge.sagepub.com/sites/default/files/Appendices_Booth_Richard_for_online.pdf)
Supplement: Supplementary file 1 [file Appendices_Booth_Richard_for_online.pdf]

**Table 1 Date of Democratization and Years of Democracy (through 2010) of Latin**

**American Countries**

| <b>Country</b>         | <b>Year</b> | <b>Years from Democratization to 2010</b> |
|------------------------|-------------|-------------------------------------------|
| Argentina              | 1983        | 27                                        |
| Bolivia                | 1983        | 27                                        |
| Brazil                 | 1990        | 20                                        |
| Chile                  | 1989        | 21                                        |
| Colombia <sup>a</sup>  | 1958        | 26                                        |
| Costa Rica             | 1953        | 57                                        |
| Dominican Republic     | 1970        | 40                                        |
| Ecuador <sup>b</sup>   | 1996        | 12                                        |
| El Salvador            | 1994        | 16                                        |
| Guatemala              | 1996        | 14                                        |
| Honduras <sup>c</sup>  | 1998        | 1                                         |
| Mexico                 | 2000        | 10                                        |
| Nicaragua              | 1990        | 20                                        |
| Panama                 | 1994        | 14                                        |
| Paraguay               | 1993        | 15                                        |
| Peru <sup>d</sup>      | 2001        | 9                                         |
| Uruguay                | 1985        | 25                                        |
| Venezuela <sup>e</sup> | 1958        | 51                                        |

<sup>a</sup> Many observers date the onset of Colombian democracy only at the end of the National Front period (an interregnum of alternating Liberal and Conservative Party presidencies) from 1958 until 1974. We count years since democratization as beginning in 1974.

<sup>c</sup> Honduras's 2009 civilian and military coup against the Manuel Zelaya was followed by a late 2009 election with the return to nominal constitutional rule at that date.

<sup>d</sup> Classified by Smith as only semi-democratic as of 2000. We count years since democratization as those since the post-Fujimori Alejandro Toledo government was constitutionally elected in 2001.

<sup>e</sup> Classified by Smith as a democracy from 1958 through 1998, then as a semi-democracy from the election of Hugo Chávez to the presidency in 1999. We count years from democratization in 1958 for this value because regular presidential elections were conducted through 2010.

*Source:* Peter Smith, *Democracy in Latin America*, Oxford: Oxford University Press, 2005,  
Appendix 1; various internet sources on presidential administrations in Latin America.

**Table 2 Select Latin American Countries' Democracy Scores, Freedom House combined and Polity IV, 2009**

| Country            | Freedom House 2009 (combined-inverted) <sup>a</sup> | Polity IV 2009 score <sup>b</sup> | Country                | Freedom House 2009 (combined-inverted) <sup>a</sup> | Polity IV Score <sup>b</sup> |
|--------------------|-----------------------------------------------------|-----------------------------------|------------------------|-----------------------------------------------------|------------------------------|
| Argentina          | 10                                                  | 8                                 | Guatemala              | 7                                                   | 8                            |
| Bolivia            | 8                                                   | 7                                 | Honduras               | 8                                                   | 7                            |
| Brazil             | 10                                                  | 8                                 | Mexico                 | 9                                                   | 8                            |
| Chile              | 12                                                  | 10                                | Nicaragua              | 7                                                   | 9                            |
| Colombia           | 7                                                   | 7                                 | Panama                 | 11                                                  | 9                            |
| Costa Rica         | 12                                                  | 10                                | Paraguay               | 8                                                   | 8                            |
| Dominican Republic | 10                                                  | 8                                 | Peru                   | 9                                                   | 9                            |
| Ecuador            | 8                                                   | 5                                 | Uruguay                | 12                                                  | 10                           |
| El Salvador        | 9                                                   | 8                                 | Venezuela <sup>c</sup> | 6                                                   | -3                           |

<sup>a</sup>Freedom House's two measures of freedom (civil liberties and political rights), each range from 1 to 7 with 1 being the highest score. In our scale, these two measures are combined, normed to zero by subtracting 2 from the total, and inverted to form a democracy ranking ranging from lowest possible score of zero (least democratic) to a highest possible score of 12 (most democratic).

<sup>b</sup>The Polity IV score of autocracy to democracy ranges from -10 (most autocratic) to +10 (most democratic).

*Sources:* Freedom House, *Freedom in the World 2009*, accessed, March 26, 2012,

<http://www.freedomhouse.org/report/freedom-world/2009/>; Monty G. Marshall and Keith

Jagers, *Polity IV Country Reports 2010*, accessed March 26, 2012,

<http://www.systemicpeace.org/polity/polity06.htm#nam>.

**Table 2.1a Factor Analysis of Democracy-related Attitudes**

|                                                                                                                                | <b>Factors<sup>a</sup></b> |                                               |                                           |
|--------------------------------------------------------------------------------------------------------------------------------|----------------------------|-----------------------------------------------|-------------------------------------------|
|                                                                                                                                | <b>Political Tolerance</b> | <b>Support for Basic Participation Rights</b> | <b>Expressed Preference for Democracy</b> |
| Support for Democracy                                                                                                          | .204                       | .281                                          | .997                                      |
| Of people participating in legal demonstrations. How much do you approve or disapprove?                                        | .371                       | .811                                          | .191                                      |
| Of people participating in an organization or group to try to solve community problems. How much do you approve or disapprove? | .284                       | .850                                          | .218                                      |
| Of people working for campaigns for a political party or candidate. How much do you approve or disapprove?                     | .296                       | .787                                          | .280                                      |
| Vote                                                                                                                           | .774                       | .307                                          | .212                                      |
| Protest                                                                                                                        | .810                       | .419                                          | .194                                      |
| Run for Office                                                                                                                 | .886                       | .284                                          | .139                                      |
| Free Speech                                                                                                                    | .872                       | .302                                          | .131                                      |

<sup>a</sup>Extraction Method: Principal component analysis; rotation method: Oblimin with Kaiser

normalization. (Oblimin rotation allows the factors to be associated with each other, a condition similar to the relationships among the items and respondents' cognitive space. The following table provides the resulting correlations among the factors found.)

*Source:* AmericasBarometer 2010 surveys; [www.LapopSurveys.org](http://www.LapopSurveys.org).

**Table 2.1b Correlation Matrix among Democracy Dimensions (for Table 2.1a)**

| <b>Component</b>                       | <b>Political Tolerance</b> | <b>Support for Basic Participation Rights</b> | <b>Expressed Preference for Democracy</b> |
|----------------------------------------|----------------------------|-----------------------------------------------|-------------------------------------------|
| Political Tolerance                    | -                          |                                               |                                           |
| Support for Basic Participation Rights | .381                       | -                                             |                                           |
| Expressed Preference for Democracy     | .196                       | .278                                          | -                                         |

**Table 3 Individual-level Items Variable Description and Question Wording, 2010 AmericasBarometer surveys (English Translation)**

|                                                      |                                                                                                                                                                                                                                                                                             |
|------------------------------------------------------|---------------------------------------------------------------------------------------------------------------------------------------------------------------------------------------------------------------------------------------------------------------------------------------------|
| Political interest                                   | <i>How much interest do you have in politics: a lot, some, little or none? (1) A lot (2) Some (3) Little (4) None (88) DK (98)</i>                                                                                                                                                          |
| Interpersonal trust                                  | <i>Now, speaking of the people from around here, would you say that people in this community are very trustworthy, somewhat trustworthy, not very trustworthy or untrustworthy? (1) Very trustworthy (2) Somewhat trustworthy (3) Not very trustworthy (4) Untrustworthy (88) DK (98)DA</i> |
| Satisfaction with democracy                          | <i>In general, would you say that you are very satisfied, satisfied, dissatisfied or very dissatisfied with the way democracy works in country? (1) Very satisfied (2) Satisfied (3) Dissatisfied (4) Very dissatisfied</i>                                                                 |
| Satisfaction with president's performance            | <i>: Speaking in general of the current administration, how would you rate the job performance of President _____? (1) Very good (2) Good (3) Neither good nor bad (fair) (4) Bad (5) Very bad (88) DK (98)DA</i>                                                                           |
| Satisfaction with government's economic performance  | <i>To what extent would you say that the current administration is managing the economy well? (1)Not at all...(7)A lot</i>                                                                                                                                                                  |
| Perception of national economic situation            | <i>How would you describe the country's economic situation? Would you say that it is very good, good, neither good nor bad, bad or very bad? (1) Very good (2) Good (3) Neither good nor bad (fair) (4) Bad (5) Very bad (88) Doesn't know (98)Doesn't Answer</i>                           |
| Perception of personal economic situation            | <i>How would you describe your overall economic situation? Would you say that it is very good, good, neither good nor bad, bad or very bad? (1) Very good (2) Good (3) Neither good nor bad (fair) (4) Bad (5) Very bad (88) Don't know (98) Doesn't answer</i>                             |
| Perception of own family's economic situation        | <i>Over the past two years, has the income of your household: (1) Increased? (2) Remained the same? (3) Decreased? (88) DK (98) DA</i>                                                                                                                                                      |
| Number of ways victimized by corruption in past year | <i>In the last twelve months, did any government employee ask you for a bribe? Any municipal employee? At work? In the courts? In a public health clinic or hospital? In your child's school? (0) No, (1) Yes [Answers summed to provide total.]</i>                                        |
| Perception of insecurity                             | <i>Speaking of the neighborhood where you live and thinking of the possibility of being assaulted or robbed, do you feel very safe, somewhat safe, somewhat unsafe or very unsafe? (1) Very safe (2) Somewhat safe (3) Somewhat unsafe (4) Very unsafe (88) DK (98)DR</i>                   |
| Critical and quarrelsome personality                 | <i>Here are a series of personality traits that may or may not apply to you. Using the 1-7 ladder, where 1 means "strongly disagree" and 7 means "strongly agree," please tell me the number that indicates the extent to which you agree or disagree with that statement. You should</i>   |

|                                           |                                                                                                                                                                                                                                                                                                                                                                              |
|-------------------------------------------|------------------------------------------------------------------------------------------------------------------------------------------------------------------------------------------------------------------------------------------------------------------------------------------------------------------------------------------------------------------------------|
|                                           | <i>rate the extent to which the pair of traits applies to you, even if one characteristic applies more strongly than the other.<br/>...Critical and quarrelsome person?</i>                                                                                                                                                                                                  |
| Anxious and easily upset personality      | <i>...Anxious and easily upset person?</i>                                                                                                                                                                                                                                                                                                                                   |
| Quiet and shy personality                 | <i>...Quiet and shy person?</i>                                                                                                                                                                                                                                                                                                                                              |
| Worried about a national terrorist attack | <i>How worried are you that there will be a violent attack by terrorists in (country) in the next 12 months? Are you very, somewhat, a little, or not at all worried, or would you say that you have not thought much about this? (1) Very worried (2) Somewhat worried (3) A little worried (4) Not at all worried (5) Haven't thought much about this (88) DK (98) DA?</i> |

Source: AmericasBarometer 2010 questionnaires; [www.LapopSurveys.org](http://www.LapopSurveys.org).

**Table 4 Regression Models for Individual-level Influences on Democratic Norms Variables**

(cell values are T-ratios<sup>a</sup>)

| <b>Variables</b>                                                                         | <b>Express support for democracy</b> | <b>Support for basic participation rights</b> | <b>Tolerance of system critics' participation</b> |
|------------------------------------------------------------------------------------------|--------------------------------------|-----------------------------------------------|---------------------------------------------------|
| Sex                                                                                      | -2.785                               | -3.286                                        | -6.797                                            |
| How old are you?                                                                         | 15.423                               | -0.116                                        | -0.847                                            |
| How many years of schooling have you completed?                                          | 10.087                               | 8.596                                         | 7.920                                             |
| Standard of living based on household artifacts                                          | 5.394                                | 4.366                                         | 5.315                                             |
| Political interest                                                                       | 8.449                                | 19.190                                        | 11.499                                            |
| Interpersonal trust                                                                      | 4.075                                | 7.377                                         | 4.645                                             |
| Satisfaction with democracy                                                              | 9.366                                | 2.500                                         | -0.988                                            |
| Satisfaction performance of current president                                            | 1.357                                | -1.671                                        | -10.246                                           |
| Government economic performance                                                          | 6.123                                | 4.646                                         | -1.750                                            |
| Perception of national economic situation                                                | -0.648                               | -1.730                                        | 0.739                                             |
| Perception of personal economic situation                                                | -0.315                               | -1.588                                        | -2.250                                            |
| Perception of family economic situation                                                  | -2.122                               | -2.544                                        | -0.682                                            |
| Number of ways victimized by corruption in past year                                     | -4.025                               | -3.270                                        | -2.631                                            |
| Perception of insecurity                                                                 | -1.242                               | -0.451                                        | 0.074                                             |
| “You see yourself as a critical and quarrelsome person”                                  | -5.429                               | -4.077                                        | 4.835                                             |
| “You see yourself as an anxious and easily upset person”                                 | -1.649                               | -0.587                                        | -1.132                                            |
| “You see yourself as a quiet and shy person”                                             | -4.093                               | -6.790                                        | -3.498                                            |
| Worried about national terrorist attack                                                  | -6.383                               | -6.560                                        | -9.861                                            |
| Country dummies calculated but not shown to conserve space (case excluded is Costa Rica) | -                                    | -                                             | -                                                 |

<sup>a</sup>T-ratios indicate increased strength of independent association between the dependent variable and explanatory variable, other variables influence held constant, by having greater absolute numerical values. A significant t-ratio at the .01 (1 in 100) level of probability has an absolute value greater than or equal to 2.6. We use this criterion of significance rather than the usual because the very large pooled sample size tends to give high significance values to weak associations when using the .05 criterion. The coefficients' signs indicate the direction of



association (slope of the regression line between the dependent variable and the explanatory variable – as one variable increases the other decreases).

*Source:* AmericasBarometer 2010 surveys; [www.LapopSurveys.org](http://www.LapopSurveys.org).

**Table 5 Multiple Regression Models for System (Country)-level Influences on Democratic Norms Variables (cell values are T-ratios<sup>a</sup>)**

| <b>Variables</b>                            | <b>Express support for democracy</b> | <b>Support for basic participation rights</b> | <b>Tolerance of system critics' participation</b> |
|---------------------------------------------|--------------------------------------|-----------------------------------------------|---------------------------------------------------|
| Percent living in urban areas               | 7.654                                | 5.039                                         | 9.645                                             |
| Percent indigenous population               | 2.453                                | -5.491                                        | -4.973                                            |
| Percent unemployed                          | -5.589                               | -8.135                                        | -9.508                                            |
| Human Development Index                     | 6.829                                | 6.735                                         | 3.388                                             |
| Freedom House democracy index inverted 2009 | 7.292                                | -5.792                                        | -5.409                                            |
| Age of democratic regime as of 2010         | 11.644                               | 27.123                                        | 17.171                                            |
| Public education expenditure as % of GDP    | -3.678                               | -16.795                                       | -3.737                                            |
| Health expenditure as % of GDP              | 17.670                               | 18.852                                        | 27.829                                            |
| Language fractionalization index            | 0.701                                | 11.482                                        | 3.743                                             |
| Ethnicity fractionalization index           | 3.832                                | -4.103                                        | 1.697                                             |
| Religious fractionalization index           | -0.520                               | 6.652                                         | -0.021                                            |

<sup>a</sup>T-ratios indicate increased strength of independent association between the dependent variable and explanatory variable, other variables influence held constant, by having greater absolute numerical values. Because aggregate variables tend to inflate t-ratios, we will consider only t-ratios greater than |5.0| as indicating significant relationships. The coefficients' signs indicate the direction of association (slope of the regression line between the dependent variable and the explanatory variable -- one increases as the other decreases).

*Source:* AmericasBarometer 2010 surveys; [www.LapopSurveys.org](http://www.LapopSurveys.org).

**Table 6.1a Factor Analysis of Authoritarian, Confrontational, and Populist Attitudes**

| Questions                                                                                                                                                                                        | Factors <sup>a, b</sup> |                       |                           |                        |                  |
|--------------------------------------------------------------------------------------------------------------------------------------------------------------------------------------------------|-------------------------|-----------------------|---------------------------|------------------------|------------------|
|                                                                                                                                                                                                  | Populism                | Support military coup | Support confront. tactics | Support executive coup | Authoritarianism |
| It is necessary for the progress of this country that our presidents/prime ministers limit the voice and vote of opposition parties, how much do you agree or disagree with that view?           | .733                    | .132                  | .171                      | .093                   | .162             |
| When the Congress/Parliament hinders the work of our government, our presidents/prime ministers should govern without the Congress/Parliament. How much do you agree or disagree with that view? | .828                    | .100                  | .192                      | .309                   | .166             |
| When the Supreme Court blocks the work of our government, the Court should be disregarded by our presidents/prime ministers. How much do you agree or disagree with that view?                   | .823                    | .084                  | .229                      | .281                   | .162             |
| The people should govern directly rather than through elected representatives. How much do you agree or disagree?                                                                                | .640                    | .140                  | .323                      | .126                   | .181             |
| Those who disagree with the majority represent a threat to the country. How much do you agree or disagree with that view?                                                                        | .624                    | .146                  | .115                      | .035                   | .138             |
| <ul style="list-style-type: none"> <li>authoritarian government better-indiff-democracy preferable</li> </ul>                                                                                    | .173                    | .170                  | .112                      | .077                   | .643             |
| <ul style="list-style-type: none"> <li>strong unelected leader better than elected</li> </ul>                                                                                                    | .153                    | .100                  | .177                      | .098                   | .717             |
| <ul style="list-style-type: none"> <li>iron fist not participation of all</li> </ul>                                                                                                             | .118                    | .155                  | .002                      | .115                   | .702             |
| Would you support a military coup under the following circumstances?                                                                                                                             | .078                    | .732                  | .163                      | .197                   | .143             |
| <ul style="list-style-type: none"> <li>military coup if unemployment high</li> </ul>                                                                                                             |                         |                       |                           |                        |                  |
| <ul style="list-style-type: none"> <li>military coup if crime high</li> </ul>                                                                                                                    | .181                    | .879                  | .074                      | .152                   | .201             |
| <ul style="list-style-type: none"> <li>military coup if corruption high</li> </ul>                                                                                                               | .172                    | .880                  | .093                      | .166                   | .185             |
| Would support an                                                                                                                                                                                 | .194                    | .187                  | .061                      | .890                   | .126             |
| <ul style="list-style-type: none"> <li>executive coup against legislature</li> </ul>                                                                                                             |                         |                       |                           |                        |                  |
| <ul style="list-style-type: none"> <li>executive coup against Supreme Court</li> </ul>                                                                                                           | .195                    | .209                  | .088                      | .884                   | .151             |
| Support for right to dissent                                                                                                                                                                     | .184                    | .006                  | .805                      | .045                   | .025             |
| Support for armed rebellion against elected government                                                                                                                                           | .253                    | .106                  | .842                      | .078                   | .114             |
| Support for citizens taking law in own hands                                                                                                                                                     | .202                    | .224                  | .654                      | .072                   | .214             |

<sup>a</sup>Extraction Method: Principal component analysis; Rotation method: Oblimin with Kaiser normalization. (Oblimin rotation allows the factors to be associated with each other, a condition similar to the relationships among the items and respondents' cognitive space. The following table provides the resulting correlations among the factors found.)

<sup>b</sup> Shaded areas indicate variables that associate most strongly with the factor (coefficients range from -1.0 to 1.0).

*Source:* AmericasBarometer 2010 surveys; [www.LapopSurveys.org](http://www.LapopSurveys.org).

**Table 6.1b Correlation Matrix among Authoritarian, Confrontational and Populist Attitudes Dimensions (for Table 6.1a)**

|                                           | <b>Populism</b> | <b>Support military coup</b> | <b>Support confrontational tactics</b> | <b>Support executive coup</b> | <b>Authoritarianism</b> |
|-------------------------------------------|-----------------|------------------------------|----------------------------------------|-------------------------------|-------------------------|
| Populism                                  | -               |                              |                                        |                               |                         |
| Support military coup                     | .161            | -                            |                                        |                               |                         |
| Support confrontational political tactics | .256            | .126                         | -                                      |                               |                         |
| Support executive coup                    | .198            | .184                         | .079                                   | -                             |                         |
| Authoritarianism                          | .210            | .212                         | .138                                   | .133                          | -                       |

**Table 7 Regression Models for Individual-level Influences on Authoritarianism and Related Norms<sup>a</sup>**

| <b>Variables</b>                                                                  | <b>Authoritarianism</b> | <b>Support military coup</b> | <b>Support executive coup</b> | <b>Populist attitudes</b> | <b>Support confront. tactics</b> |
|-----------------------------------------------------------------------------------|-------------------------|------------------------------|-------------------------------|---------------------------|----------------------------------|
| Sex                                                                               | -3.496                  | 1.268                        | -5.677                        | -0.283                    | -2.721                           |
| How old are you?                                                                  | -5.419                  | -16.225                      | -0.925                        | -8.125                    | -21.617                          |
| How many years of schooling have you completed?                                   | -14.510                 | -8.942                       | -5.707                        | -14.953                   | -8.140                           |
| Standard of living based on household artifacts                                   | -1.818                  | -2.108                       | -1.344                        | -7.107                    | -8.243                           |
| Political interest                                                                | -5.486                  | -5.158                       | -0.629                        | -3.426                    | 6.102                            |
| Interpersonal trust                                                               | -5.014                  | -3.954                       | -4.021                        | -4.361                    | -3.903                           |
| Satisfaction with democracy                                                       | -5.535                  | -2.955                       | 0.044                         | -2.316                    | -4.632                           |
| Satisfaction performance of current president                                     | 2.282                   | -1.462                       | 7.597                         | 7.611                     | -10.196                          |
| Government economic performance                                                   | 0.026                   | -2.672                       | 3.256                         | 25.952                    | 10.744                           |
| Perception of national economic situation                                         | -6.070                  | -9.384                       | 0.476                         | 0.453                     | 0.649                            |
| Perception of personal economic situation                                         | 3.103                   | -0.357                       | -0.504                        | 2.305                     | 1.088                            |
| Perception of family economic situation                                           | -1.428                  | 0.938                        | -0.031                        | 0.563                     | -1.203                           |
| Number of ways victimized by corruption in past year                              | 7.241                   | 6.545                        | 6.546                         | 5.695                     | 5.502                            |
| Perception of insecurity                                                          | 3.710                   | 4.027                        | 2.113                         | 1.647                     | 2.539                            |
| “You see yourself as a critical and quarrelsome person”                           | 3.886                   | -0.013                       | 2.383                         | 11.609                    | 19.399                           |
| “You see yourself as an anxious and easily upset person”                          | 6.008                   | 5.160                        | 1.703                         | 9.861                     | 7.373                            |
| “You see yourself as a quiet and shy person”                                      | 2.506                   | 3.862                        | 0.496                         | 14.681                    | 10.574                           |
| Worried about national terrorist attack                                           | 10.841                  | 12.426                       | 5.490                         | 15.077                    | 5.111                            |
| Country (calculated but not shown to conserve space (case excluded is Costa Rica) | -                       | -                            | -                             | -                         | -                                |

<sup>a</sup> Cell values are T-ratios. T-ratios indicate increased strength of independent association between the dependent variable and explanatory variable, other variables influence held constant, by having greater absolute numerical values. A significant t-ratio at the .01 (1 in 100) level of probability has an absolute value greater than or equal to 2.6. We use this criterion of significance rather than the usual because the very large pooled sample size tends to give high significance values to weak associations when using the .05 criterion. The coefficients' signs indicate the direction of association (slope of the regression line between the dependent variable and the explanatory variable -- one increases as the other decreases).

*Source:* AmericasBarometer 2010 surveys; [www.LapopSurveys.org](http://www.LapopSurveys.org).

---

**Table 8 Regression Models for System (Country)-level Influences on Authoritarianism and Related Norms<sup>a</sup>**

| <b>Variables</b>                            | <b>Authoritarianism</b> | <b>Support military coup</b> | <b>Support executive coup</b> | <b>Populist attitudes</b> | <b>Support confront . tactics</b> |
|---------------------------------------------|-------------------------|------------------------------|-------------------------------|---------------------------|-----------------------------------|
| Percent living in urban areas               | -6.360                  | -.688                        | .998                          | -13.379                   | -4.492                            |
| Percent indigenous population               | -6.889                  | -4.938                       | -.539                         | 4.182                     | .853                              |
| Percent unemployed                          | 8.615                   | -.623                        | -.645                         | 13.789                    | 3.766                             |
| Human Development Index                     | -12.011                 | -11.420                      | .453                          | .130                      | -6.211                            |
| Freedom House democracy index inverted 2009 | 11.945                  | -.527                        | -3.933                        | -1.574                    | .372                              |
| Age of democratic regime as of 2010         | -5.059                  | -6.115                       | .972                          | -14.610                   | -5.823                            |
| Public education expenditure as % of GDP    | 2.627                   | 1.530                        | 1.067                         | 4.750                     | .196                              |
| Health expenditure as % of GDP              | -10.558                 | -12.286                      | -7.605                        | -20.977                   | .444                              |
| Language fractionalization index            | 4.312                   | -4.624                       | 10.948                        | -5.832                    | -8.318                            |
| Ethnicity fractionalization index           | -1.407                  | 2.421                        | -.844                         | -.894                     | 3.090                             |
| Religious fractionalization index           | -2.303                  | -.529                        | 1.391                         | -.462                     | -8.885                            |

<sup>a</sup> Cell values are T-ratios. T-ratios indicate increased strength of independent association between the dependent variable and explanatory variable, other variables influence held constant, by having greater absolute numerical values. Because aggregate variables tend to inflate t-ratios, we will consider only t-ratios greater than |5.0| as indicating significant relationships. The coefficients' signs indicate the direction of association (slope of the regression line between the dependent variable and the explanatory variable -- one increases as the other decreases).

*Source:* AmericasBarometer 2010 surveys; [www.LapopSurveys.com](http://www.LapopSurveys.com).



**Table 9 Distribution of Attitudes toward Political Authority (Percent) by Country**

|                                             | Country     | Democratic Norms Syndrome |            |             |
|---------------------------------------------|-------------|---------------------------|------------|-------------|
|                                             |             |                           | <i>Low</i> | <i>High</i> |
| <b>Authoritarian<br/>Norms<br/>Syndrome</b> | Mexico      | Low                       | 21.0       | 63.9        |
|                                             |             | High                      | 4.7        | 10.5        |
|                                             | Guatemala   | Low                       | 20.8       | 60.1        |
|                                             |             | High                      | 7.4        | 11.7        |
|                                             | El Salvador | Low                       | 28.3       | 57.7        |
|                                             |             | High                      | 4.5        | 9.4         |
|                                             | Honduras    | Low                       | 34.3       | 58.5        |
|                                             |             | High                      | 3.5        | 3.8         |
|                                             | Nicaragua   | Low                       | 15.8       | 77.0        |
|                                             |             | High                      | 1.6        | 5.6         |
|                                             | Costa Rica  | Low                       | 13.5       | 77.5        |
|                                             |             | High                      | 1.3        | 7.7         |
|                                             | Panama      | Low                       | 25.2       | 67.4        |
|                                             |             | High                      | 1.5        | 5.9         |
|                                             | Colombia    | Low                       | 16.7       | 73.8        |
|                                             |             | High                      | 2.5        | 6.9         |
|                                             | Ecuador     | Low                       | 25.6       | 60.8        |
|                                             |             | High                      | 4.4        | 9.2         |
|                                             | Bolivia     | Low                       | 27.4       | 63.0        |
|                                             |             | High                      | 3.3        | 6.3         |
|                                             | Peru        | Low                       | 24.5       | 54.2        |
|                                             |             | High                      | 9.0        | 12.3        |
|                                             | Paraguay    | Low                       | 21.9       | 58.3        |
|                                             |             | High                      | 6.8        | 13.0        |
|                                             | Chile       | Low                       | 18.1       | 73.6        |
|                                             |             | High                      | 3.3        | 5.0         |
|                                             | Uruguay     | Low                       | 6.7        | 84.6        |
|                                             |             | High                      | 2.5        | 6.2         |
| Brazil                                      | Low         | 17.6                      | 70.6       |             |
|                                             | High        | 3.2                       | 8.6        |             |
| Venezuela                                   | Low         | 15.0                      | 78.9       |             |
|                                             | High        | 1.5                       | 4.6        |             |
| Argentina                                   | Low         | 10.6                      | 81.9       |             |
|                                             | High        | 2.3                       | 5.3        |             |
| Dominican<br>Republic                       | Low         | 18.5                      | 68.6       |             |
|                                             | High        | 3.3                       | 9.6        |             |
| Total                                       | Low         | 20.1                      | 68.4       |             |
|                                             | High        | 3.7                       | 7.8        |             |

Source: AmericasBarometer 2010 surveys; www.LapopSurveys.org.

## Figure 1 Perceptions of Personal Insecurity

[Use the following data to create a bar chart similar to the one shown below.]

### Report

Mean

| Country            | Perception of Insecurity |
|--------------------|--------------------------|
| Mexico             | 43.52                    |
| Guatemala          | 39.94                    |
| El Salvador        | 49.70                    |
| Honduras           | 34.03                    |
| Nicaragua          | 38.93                    |
| Costa Rica         | 32.17                    |
| Panama             | 36.06                    |
| Colombia           | 39.03                    |
| Ecuador            | 46.60                    |
| Bolivia            | 46.09                    |
| Peru               | 53.79                    |
| Paraguay           | 41.71                    |
| Chile              | 40.76                    |
| Uruguay            | 39.31                    |
| Brazil             | 38.12                    |
| Venezuela          | 49.16                    |
| Argentina          | 52.02                    |
| Dominican Republic | 46.52                    |
| United States      | 22.47                    |
| Canada             | 23.65                    |
| Total              | 41.60                    |

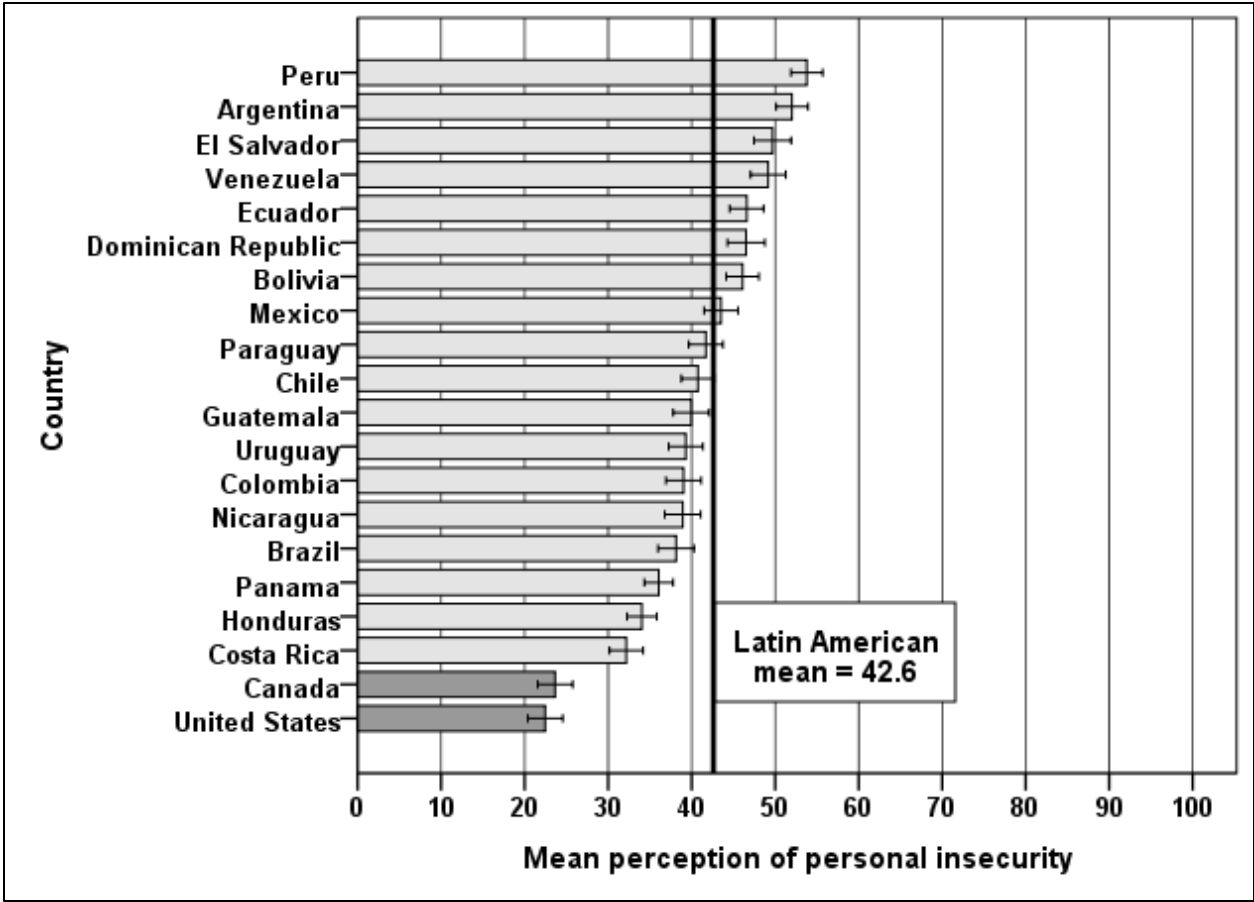

Notes: Error bars = 99.0 percent confidence interval.

Cases weighted for equal size per country.

Source: AmericasBarometer 2010 surveys; www.LapopSurveys.org.

**Figure 2 Standard Deviations of Left-Right Ideological Distribution for Latin American Nations, 2010**

**[Use this data to create a bar chart similar to the one shown below.]**

**Report**

Std. Deviation

| Country            | According to the meaning that the terms "left" and "right" have for you, and thinking of your own political leanings, where would you place yourself on this scale? |
|--------------------|---------------------------------------------------------------------------------------------------------------------------------------------------------------------|
| Mexico             | 2.457                                                                                                                                                               |
| Guatemala          | 2.260                                                                                                                                                               |
| El Salvador        | 2.523                                                                                                                                                               |
| Honduras           | 2.294                                                                                                                                                               |
| Nicaragua          | 3.029                                                                                                                                                               |
| Costa Rica         | 2.560                                                                                                                                                               |
| Panama             | 2.250                                                                                                                                                               |
| Colombia           | 2.443                                                                                                                                                               |
| Ecuador            | 2.308                                                                                                                                                               |
| Bolivia            | 1.933                                                                                                                                                               |
| Peru               | 2.026                                                                                                                                                               |
| Paraguay           | 2.120                                                                                                                                                               |
| Chile              | 2.285                                                                                                                                                               |
| Uruguay            | 2.505                                                                                                                                                               |
| Brazil             | 2.321                                                                                                                                                               |
| Venezuela          | 2.371                                                                                                                                                               |
| Argentina          | 1.796                                                                                                                                                               |
| Dominican Republic | 2.990                                                                                                                                                               |
| Total              | 2.427                                                                                                                                                               |

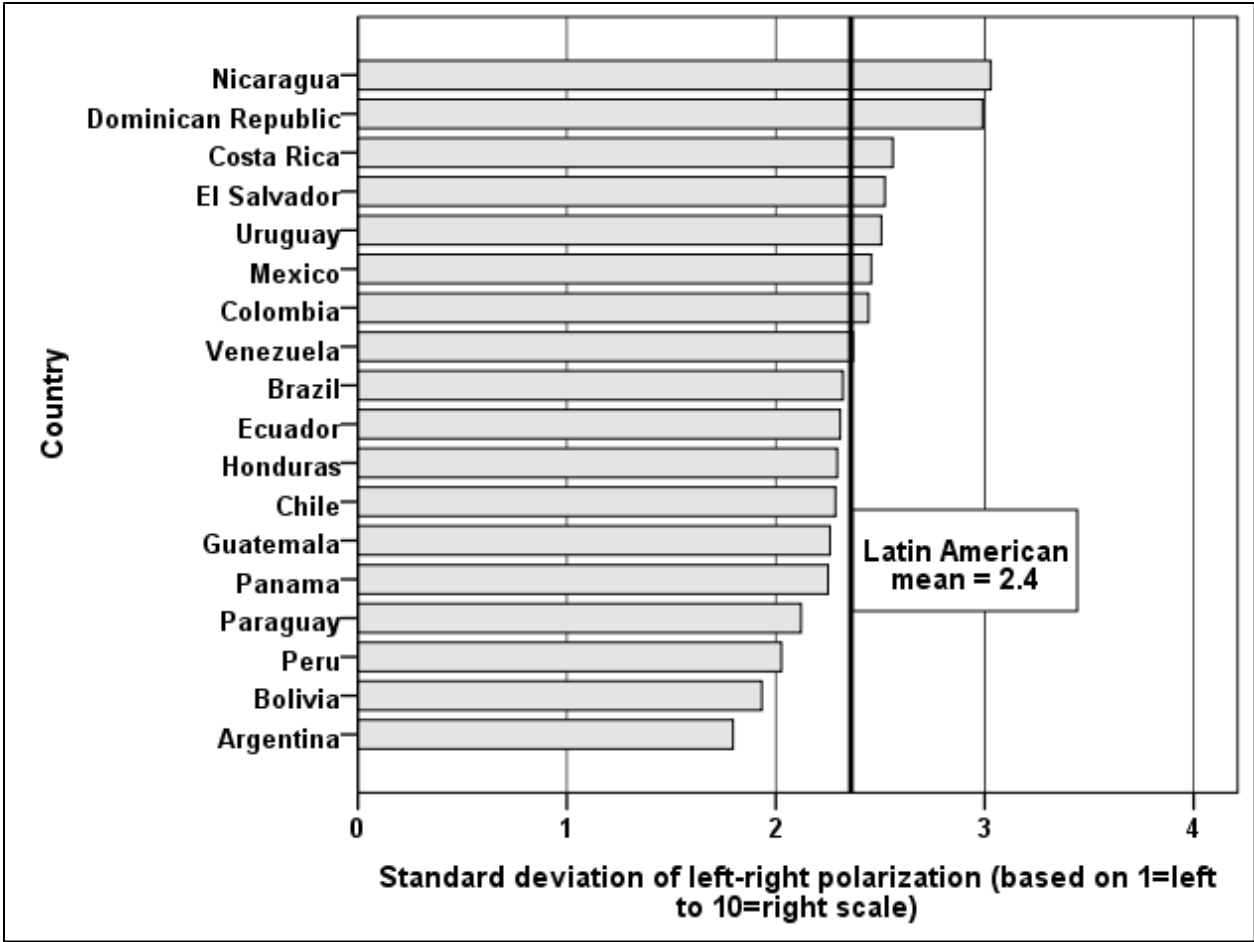

*Note:* Cases weighted for equal size per country.

*Source:* AmericasBarometer 2010 surveys; [www.LapopSurveys.org](http://www.LapopSurveys.org).

Figure 3 Left-Right Ideological Self-Positioning, 2010 <sup>a, b, c</sup>

[Use the numbers shown in the chart below to replicate the graph.]

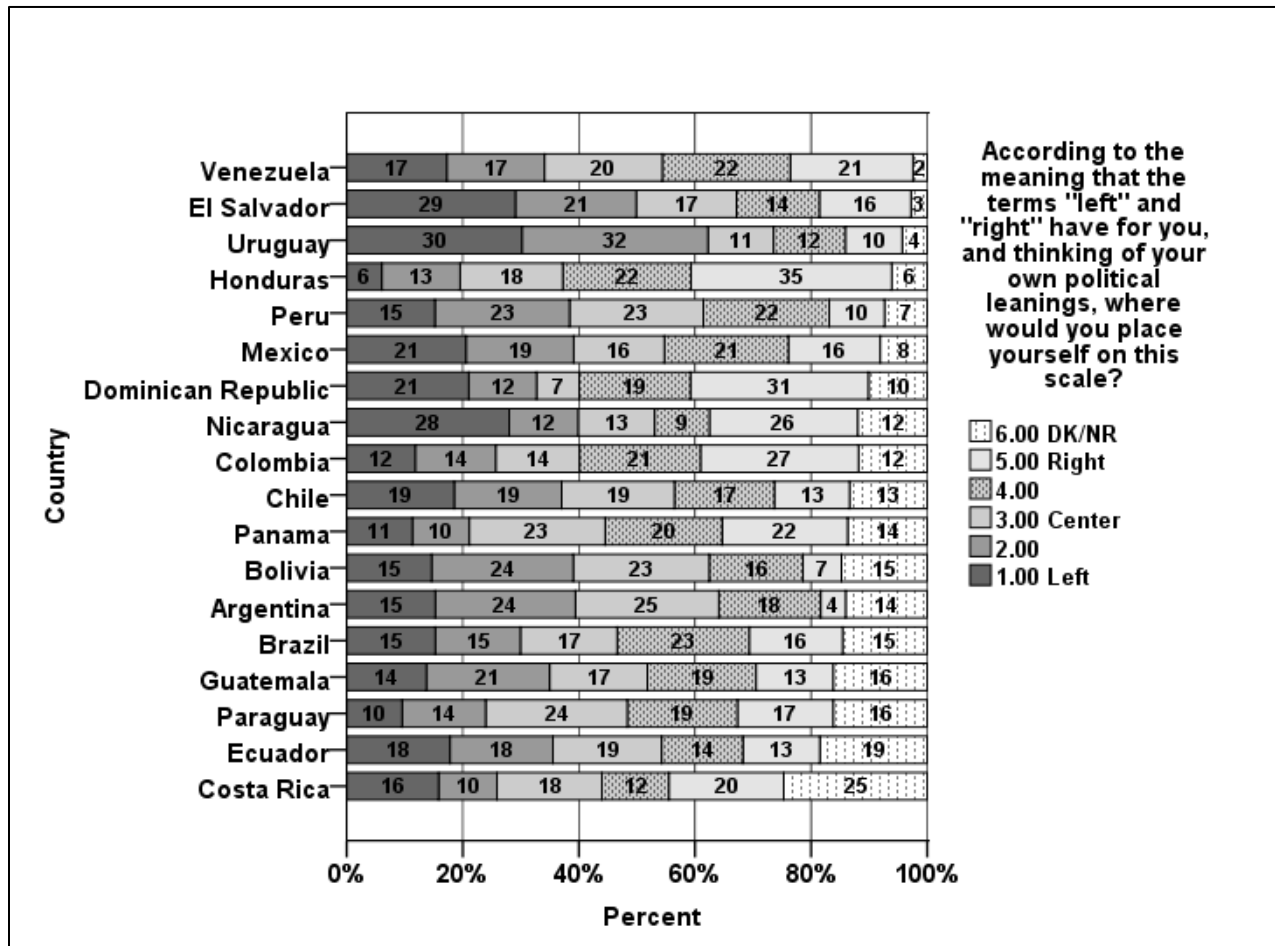

Note: Cases weighted for equal size per country.

<sup>a</sup> Positions 1-10 recoded by combining positions 1 and 2, 3 and 4, and so on successively to form five categories.

<sup>b</sup> Gray-toned portion of the bar on the right represents the percent of respondents unable and declining to place themselves on a the left-right continuum.

<sup>c</sup> Values on the bars are the percent corresponding to each segment.

Source: AmericasBarometer 2010 surveys; www.LapopSurveys.org.

**Table 10 Factor Analysis<sup>a</sup> of Attitudes toward the Role of the State**

| <b>Questions</b>                                                                                                                                                                                                   | <b>Factors<sup>b</sup></b> |                         |
|--------------------------------------------------------------------------------------------------------------------------------------------------------------------------------------------------------------------|----------------------------|-------------------------|
|                                                                                                                                                                                                                    | <i>Welfare</i>             | <i>Public ownership</i> |
| The (country) government, instead of the private sector, should own the most important enterprises and industries of the country. How much do you agree or disagree with this statement? (1=disagree...7=disagree) | .259                       | .979                    |
| The (country) government, more than individuals, should be primarily responsible for ensuring the well-being of the people. To what extent do you agree or disagree with this statement?                           | .739                       | .377                    |
| The (country) government, more than the private sector, should be primarily responsible for creating jobs. To what extent do you agree or disagree with this statement?                                            | .797                       | .265                    |
| The (country) government should implement strong policies to reduce income inequality between the rich and the poor. To what extent do you agree or disagree with this statement?                                  | .758                       | .228                    |
| The (country) government, more than the private sector, should be primarily responsible for providing retirement pensions. How much do you agree or disagree with this statement?                                  | .824                       | .124                    |
| The (country) government, more than the private sector should be primarily responsible for providing health care services. How much do you agree or disagree with this statement?                                  | .825                       | .066                    |

<sup>a</sup>Extraction Method: Principal Component Analysis; rotation Method: Oblimin with Kaiser

Normalization. (Oblimin rotation allows the factors to be associated with each other, a condition similar to the relationships among the items and respondents' cognitive space. The following table provides the resulting correlations among the factors found.)

<sup>b</sup>Correlation between the 2 factors = .25.

Source: AmericasBarometer 2010 surveys; www.LapopSurveys.org.

**Table 11 Life Expectancy Changes, 1993-2009 for Select Latin American Countries<sup>a</sup>**

| <b>Country</b>          | <b>Life Expectancy, 1993</b> | <b>Life Expectancy, 2009</b> | <b>Change in Life Expectancy, 1993-2009</b> | <b>Change (%) in Life Expectancy, 1993-2009</b> |
|-------------------------|------------------------------|------------------------------|---------------------------------------------|-------------------------------------------------|
| Guatemala               | 64                           | 71                           | 7                                           | 10.9                                            |
| Nicaragua               | 66                           | 73                           | 7                                           | 10.6                                            |
| Peru                    | 67                           | 74                           | 7                                           | 10.4                                            |
| Bolivia                 | 60                           | 66                           | 6                                           | 10.0                                            |
| Honduras                | 68                           | 73                           | 5                                           | 7.4                                             |
| Ecuador                 | 70                           | 75                           | 5                                           | 7.1                                             |
| Chile                   | 74                           | 79                           | 5                                           | 6.8                                             |
| <b>All 18 countries</b> | <b>69.4</b>                  | <b>73.8</b>                  | <b>4.4</b>                                  | <b>6.3</b>                                      |
| El Salvador             | 68                           | 72                           | 4                                           | 5.9                                             |
| Brazil                  | 68                           | 72                           | 4                                           | 5.9                                             |
| Colombia                | 69                           | 73                           | 4                                           | 5.8                                             |
| Dominican Republic      | 69                           | 73                           | 4                                           | 5.8                                             |
| Mexico                  | 72                           | 76                           | 4                                           | 5.6                                             |
| Paraguay                | 69                           | 72                           | 3                                           | 4.3                                             |
| Argentina               | 72                           | 75                           | 3                                           | 4.2                                             |
| Panama                  | 73                           | 76                           | 3                                           | 4.1                                             |
| Uruguay                 | 73                           | 76                           | 3                                           | 4.1                                             |
| Costa Rica              | 76                           | 79                           | 3                                           | 3.9                                             |
| Venezuela               | 72                           | 74                           | 2                                           | 2.8                                             |

Source: World Bank Data, 2013, <http://data.worldbank.org/country>; accessed February 15, 2013.

<sup>a</sup> Countries ordered from greatest to least percentage improvement over 1993.



**Table 12 Economic Performance for Select Latin American Countries <sup>a</sup>, 1993-2009**

| <b>Country</b>      | <b>Gross National Income (GNI) per capita 1993<sup>a</sup></b> | <b>Gross National Income (GNI) per capita 2009<sup>a</sup></b> | <b>Percent Change in GNI, 1993-2009</b> |
|---------------------|----------------------------------------------------------------|----------------------------------------------------------------|-----------------------------------------|
| Venezuela           | 2740                                                           | 10230                                                          | 273.4                                   |
| Chile               | 3340                                                           | 9980                                                           | 198.8                                   |
| Mexico              | 4170                                                           | 8670                                                           | 107.9                                   |
| Uruguay             | 4360                                                           | 8640                                                           | 98.2                                    |
| Brazil              | 2740                                                           | 8150                                                           | 197.4                                   |
| Argentina           | 7100                                                           | 7580                                                           | 6.8                                     |
| Panama              | 2710                                                           | 6570                                                           | 142.4                                   |
| Costa Rica          | 2790                                                           | 6200                                                           | 122.2                                   |
| <b>18 countries</b> | <b>2279.0</b>                                                  | <b>5366.0</b>                                                  | <b>135.5</b>                            |
| Colombia            | 1423                                                           | 5050                                                           | 254.9                                   |
| Dominican Republic  | 1423                                                           | 4690                                                           | 229.6                                   |
| Peru                | 1423                                                           | 4190                                                           | 194.4                                   |
| Ecuador             | 1140                                                           | 3630                                                           | 218.4                                   |
| El Salvador         | 1190                                                           | 3310                                                           | 178.2                                   |
| Guatemala           | 1170                                                           | 2660                                                           | 127.4                                   |
| Paraguay            | 1550                                                           | 2230                                                           | 43.9                                    |
| Honduras            | 650                                                            | 1780                                                           | 173.8                                   |
| Bolivia             | 810                                                            | 1640                                                           | 102.5                                   |
| Nicaragua           | 300                                                            | 1380                                                           | 360.0                                   |

<sup>a</sup> Countries ordered from greatest to least percentage improvement over 1993.

Source: World Bank Data, 2013, <http://data.worldbank.org/country>; accessed February 15, 2013.

**Figure 4 Citizen Confidence in Non-state Actors (Catholic Church and Mass Media)**

**[Note to Comp: Use the data provided to create a chart like the one shown below.]**

**Report**

Std. Deviation

| Country            | Trust in the Catholic church | Trust in the mass media |
|--------------------|------------------------------|-------------------------|
| Mexico             | 34.71210                     | 28.95183                |
| Guatemala          | 36.92332                     | 28.13405                |
| El Salvador        | 37.29532                     | 28.98198                |
| Honduras           | 29.59977                     | 22.22886                |
| Nicaragua          | 38.31391                     | 27.49530                |
| Costa Rica         | 37.79619                     | 30.02558                |
| Panama             | 26.61390                     | 23.88348                |
| Colombia           | 34.05690                     | 27.36068                |
| Ecuador            | 33.92439                     | 27.25699                |
| Bolivia            | 29.75670                     | 25.03607                |
| Peru               | 32.33631                     | 25.72787                |
| Paraguay           | 31.42501                     | 28.07454                |
| Chile              | 33.69021                     | 25.06170                |
| Uruguay            | 39.06298                     | 26.85812                |
| Brazil             | 35.04952                     | 27.73008                |
| Venezuela          | 34.56248                     | 30.23877                |
| Argentina          | 35.74711                     | 29.87379                |
| Dominican Republic | 36.34429                     | 27.13681                |
| United States      |                              | 26.59369                |
| Canada             |                              | 24.27086                |
| Total              | 35.46268                     | 28.77288                |

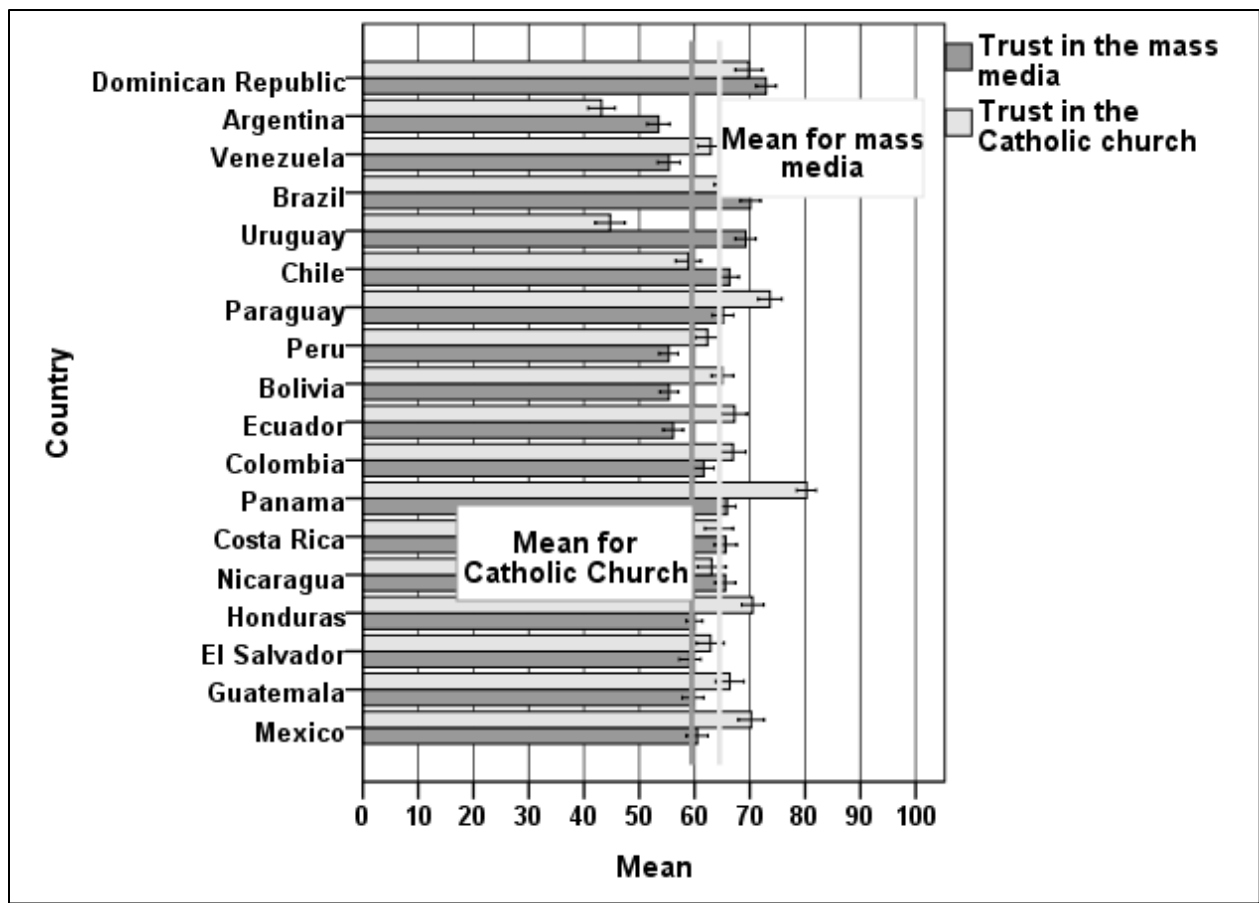

Notes: Error bars: 99 percent CI.

Cases weighted for equal size per country.

Source: AmericasBarometer 2010 surveys; www.LapopSurveys.org.

**Table 13 Individual Level Factors Influencing Respondent's Satisfaction with Democracy in His/Her Own Country**

| Model                                                 | Standardized Coefficients | t <sup>a</sup> | Sig. |
|-------------------------------------------------------|---------------------------|----------------|------|
|                                                       | Beta                      |                |      |
| (Constant)                                            |                           | 14.523         | .000 |
| Prefer democracy over authoritarian rule              | .011                      | 1.828          | .067 |
| How democratic is this country?                       | .294                      | 43.747         | .000 |
| Sex                                                   | -.007                     | -1.088         | .277 |
| How old are you?                                      | -.012                     | -1.926         | .054 |
| How many years of schooling have you completed?       | -.048                     | -6.281         | .000 |
| standard of living based on household artifacts       | -.038                     | -5.047         | .000 |
| Political Interest                                    | -.003                     | -.484          | .629 |
| Interpersonal Trust                                   | .011                      | 1.612          | .107 |
| Satisfaction Performance Current President            | .127                      | 15.466         | .000 |
| Government Economic Performance                       | .091                      | 11.057         | .000 |
| Perception of National Economic Situation             | .065                      | 9.015          | .000 |
| Perception of Personal Economic Situation             | .057                      | 8.038          | .000 |
| Perception of Family Economic Situation               | .039                      | 5.498          | .000 |
| Number of Ways Victimized in Past Year                | -.009                     | -1.439         | .150 |
| Perception of Insecurity                              | -.035                     | -5.405         | .000 |
| You see yourself as a critical and quarrelsome person | -.011                     | -1.658         | .097 |
| You see yourself as a anxious and easily upset person | .003                      | .401           | .688 |
| You see yourself as a quiet and shy person            | .001                      | .149           | .881 |
| Worried about national terrorist attack               | -.021                     | -3.400         | .001 |
| Trust in Legislature                                  | .042                      | 4.918          | .000 |
| Trust in President                                    | .043                      | 4.625          | .000 |
| Trust in Supreme Court                                | .028                      | 3.168          | .002 |
| Trust in national election agency                     | .064                      | 8.091          | .000 |
| Trust in armed forces                                 | -.020                     | -2.803         | .005 |
| Trust in political parties                            | .016                      | 2.094          | .036 |

<sup>a</sup> Cell values are T-ratios. T-ratios indicate increased strength of independent association between the dependent variable and explanatory variable, other variables influence held constant, by having greater absolute numerical values. A significant t-ratio at the .01 (1 in 100) level of probability has an absolute value greater than or equal to 2.6. We use this criterion of significance rather than the usual because the very large pooled sample size tends to give high

significance values to weak associations when using the .05 criterion. The coefficients' signs indicate the direction of association (slope of the regression line between the dependent variable and the explanatory variable -- one increases as the other decreases).

*Source:* AmericasBarometer 2010 surveys; [www.LapopSurveys.org](http://www.LapopSurveys.org).

**Table 14 System-level Factors Influencing Respondent’s Satisfaction with Democracy in His/Her Own Country**

| Model                                          | Standardized Coefficients | t       | Sig. |
|------------------------------------------------|---------------------------|---------|------|
|                                                | Beta                      |         |      |
| (Constant)                                     |                           | 22.164  | .000 |
| Percent living in urban areas                  | -.080                     | -11.447 | .000 |
| Percent indigenous population                  | .051                      | 5.406   | .000 |
| Percent unemployed                             | .036                      | 4.724   | .000 |
| Human Development Index 2009                   | .029                      | 2.551   | .011 |
| Freedom House (inverted) democracy score       | .164                      | 17.915  | .000 |
| Age of democratic regime in 2010               | .023                      | 3.138   | .002 |
| Public education expenditure as percent of GDP | .012                      | 1.670   | .095 |
| Health expenditure as percent of GDP           | -.029                     | -3.460  | .001 |
| Language fractionalization index               | 1.578                     | -3.929  | .000 |
| Ethnicity fractionalization index              | .007                      | -.878   | .380 |
| Religion fractionalization index               | .029                      | 3.300   | .001 |

<sup>a</sup> Cell values are T-ratios. T-ratios indicate increased strength of independent association between the dependent variable and explanatory variable, other variables influence held constant, by having greater absolute numerical values. Because aggregate variables tend to inflate t-ratios, we will consider only t-ratios greater than |5.0| as indicating significant relationships. The coefficients’ signs indicate the direction of association (slope of the regression line between the dependent variable and the explanatory variable -- one increases as the other decreases).

Source: AmericasBarometer 2010 surveys; [www.LapopSurveys.org](http://www.LapopSurveys.org).

**Table 15 System-level Factors Influencing Level of Civil Society Activism**

| <b>Model</b>                                   | <b>T<sup>a</sup></b> | <b>Significance</b> |
|------------------------------------------------|----------------------|---------------------|
| (Constant)                                     | 36.609               | .000                |
| Percent living in urban areas                  | -6.307               | .000                |
| Percent indigenous population                  | 6.244                | .000                |
| Percent unemployed                             | .648                 | .517                |
| Human Development Index 2009                   | -12.256              | .000                |
| Freedom House (inverted) democracy score       | .556                 | .578                |
| Age of democratic regime in 2010               | 7.512                | .000                |
| Public education expenditure as percent of GDP | 3.007                | .003                |
| Health expenditure as percent of GDP           | -19.975              | .000                |
| Language fractionalization index               | 6.635                | .000                |
| Ethnicity fractionalization index              | 5.429                | .000                |
| Religion fractionalization index               | -1.062               | .288                |

<sup>a</sup>T-ratios indicate increased strength of independent association between the dependent variable and explanatory variable, other variables influence held constant, by having greater absolute numerical values. Because aggregate variables tend to inflate t-ratios, we will consider only t-ratios greater than |5.0| as indicating significant relationships. The coefficients' signs indicate the direction of association (slope of the regression line between the dependent variable and the explanatory variable -- one increases as the other decreases).

*Source:* AmericasBarometer 2010 surveys; [www.LapopSurveys.org](http://www.LapopSurveys.org).

**Table 16 Individual-level Predictors of Overall Civil Society Activism<sup>a</sup>**

| <b>Model</b>                                         | <b>T<sup>b</sup></b> | <b>Sig.</b> |
|------------------------------------------------------|----------------------|-------------|
| (Constant)                                           | -1.927               | .054        |
| Sex                                                  | 10.879               | .000        |
| How old are you?                                     | 12.142               | .000        |
| How many years of schooling have you completed?      | 13.144               | .000        |
| standard of living based on household artifacts      | -4.552               | .000        |
| Government Economic Performance                      | 8.745                | .000        |
| Perception of National Economic Situation            | 3.267                | .001        |
| Perception of Personal Economic Situation            | 3.697                | .000        |
| Perception of Family Economic Situation              | .179                 | .858        |
| Number of Ways Victimized by Corruption in Past Year | 18.297               | .000        |
| Perception of Insecurity                             | -.553                | .580        |
| Number of children living with respondent            | 31.772               | .000        |
| Catholic religious affiliation                       | 13.318               | .000        |
| Protestant-Evangelical                               | 18.240               | .000        |
| Color of the face of the respondent                  | .469                 | .639        |
| White race                                           | 1.668                | .095        |
| Black race mulatto or moreno                         | -1.094               | .274        |
| Indigenous                                           | 7.055                | .000        |

<sup>a</sup> Country dummies were included in this model to screen out local effects, but are excluded from the presentation to save space.

<sup>b</sup> T-ratios indicate increased strength of independent association between the dependent variable and explanatory variable, other variables influence held constant, by having greater absolute numerical values. A significant t-ratio at the .01 (1 in 100) level of probability has an absolute value greater than or equal to 2.6. We use this criterion of significance rather than the usual because the very large pooled sample size tends to give high significance values to weak associations when using the .05 criterion. The coefficients' signs indicate the direction of association (slope of the regression line between the dependent variable and the explanatory variable -- one increases as the other decreases).

*Source:* AmericasBarometer 2010 surveys; [www.LapopSurveys.org](http://www.LapopSurveys.org).



**Table 16.1a Factor Analysis of Political Participation Variables (Oblimin Rotation)**

|                                       | <b>Component</b>                   |                        |                                    |                |
|---------------------------------------|------------------------------------|------------------------|------------------------------------|----------------|
|                                       | <i>Contacting public officials</i> | <i>Voting behavior</i> | <i>Party and Campaign Activity</i> | <i>Protest</i> |
| Voted last presidential election      | .014                               | .853                   | -.037                              | -.020          |
| Registered to vote                    | -.014                              | .864                   | .027                               | .008           |
| Attended political party meetings     | .054                               | -.006                  | -.665                              | .155           |
| Try to convince others how to vote    | -.033                              | -.013                  | -.721                              | -.058          |
| Worked for party or candidate         | -.001                              | .037                   | -.769                              | -.014          |
| Contacted a legislator                | .630                               | -.017                  | -.107                              | -.151          |
| Contacted any local official          | .778                               | .006                   | .008                               | -.002          |
| Contacted any government institution  | .671                               | -.018                  | .018                               | .019           |
| Demand-making on municipal government | .684                               | .037                   | .066                               | .137           |
| Participated in a protest             | .006                               | -.010                  | -.067                              | .962           |

*Notes:* Extraction Method: Principal Component Analysis.

Rotation Method: Oblimin with Kaiser Normalization. (Oblimin rotation allows the factors to be associated with each other, a condition similar to the relationships among the items and respondents' cognitive space. The following table provides the resulting correlations among the factors found.)

*Source:* AmericasBarometer 2010 surveys; [www.LapopSurveys.org](http://www.LapopSurveys.org).

**Table 16.1b Component Correlation Matrix for Political Participation Dimensions**

|                             | <b>Contacting Public<br/>Officials</b> | <b>Voting<br/>Behavior</b> | <b>Party and<br/>Campaign<br/>Activity</b> |
|-----------------------------|----------------------------------------|----------------------------|--------------------------------------------|
| Voting behavior             | .059                                   |                            |                                            |
| Party and campaign activity | -.220                                  | -.105                      |                                            |
| Protest                     | .119                                   | .032                       | -.138                                      |

**Table 17 Individual-level Predictors of Voting (Last Presidential Election)<sup>a</sup>**

|                                                        | <b>B</b> | <b>Sig.</b> | <b>Exp(B)<sup>b</sup></b> |
|--------------------------------------------------------|----------|-------------|---------------------------|
| Sex (male=1, female=2)                                 | -.120    | .001        | .887                      |
| How old are you?                                       | .049     | .000        | 1.050                     |
| Years of schooling                                     | .071     | .000        | 1.073                     |
| Household standard of living                           | .037     | .000        | 1.038                     |
| Interest in politics                                   | .276     | .000        | 1.318                     |
| Level of political knowledge                           | .391     | .000        | 1.478                     |
| Frequency of paying attention to news                  | .107     | .000        | 1.113                     |
| Frequency of internet use                              | -.114    | .000        | .892                      |
| Worked to solve community problem                      | .000     | .472        | 1.000                     |
| Attended committee for community improvement           | .003     | .000        | 1.003                     |
| Attended religious group                               | .000     | .866        | 1.000                     |
| Attended Parents Association                           | .004     | .000        | 1.004                     |
| Attended professional/ business/producers meetings     | .003     | .003        | 1.003                     |
| Attended women's group meetings                        | .000     | .834        | 1.000                     |
| Perception of gov't. econ. performance                 | .001     | .053        | 1.001                     |
| Perception of national econ. situation                 | .000     | .850        | 1.000                     |
| Perception of personal econ. situation                 | -.002    | .019        | .998                      |
| Perception of family economic situation                | -.053    | .024        | .948                      |
| Number of ways victimized by corruption in past year   | -.018    | .482        | .982                      |
| Perception of insecurity                               | -.001    | .014        | .999                      |
| Number of children living with respondent              | .214     | .000        | 1.238                     |
| Catholic religious affiliation                         | .351     | .000        | 1.421                     |
| Protestant-Evangelical                                 | .142     | .020        | 1.153                     |
| Respondent's skin color (1=very light... 11=very dark) | .001     | .789        | 1.001                     |
| White race                                             | -.087    | .038        | .916                      |
| Black race/mulatto/"moreno"                            | -.101    | .131        | .904                      |
| Indigenous race                                        | -.005    | .951        | .995                      |
| Constant                                               | -3.444   | .000        | .032                      |

<sup>a</sup>The regression model is logistic regression for a binomial variable (voted/did not vote).

Dummy variables for 17 study countries were included in the model (Costa Rica was excluded), but are omitted from this presentation to here to conserve space. The information in the Significance (Sig.) and Probability of B [Exp(B)] columns provides evidence for influence on the dependent variable. A significance smaller than .01 indicates significant influence for

this large sample size. The absolute value of the relative size of the Exp(B) coefficient above or below 1.000 indicates the strength of expectation that this independent variable's influences voting. For example, an Exp(B) for variable X of 1.400 suggests a 1.4 probability of positive influence, a value of 1.000 indicates no influence, and a value of .800 suggesting a 0.2 probability of negative influence. Significant relationships are indicated by gray cells.

*Source:* AmericasBarometer 2010 surveys; [www.LapopSurveys.org](http://www.LapopSurveys.org).

**Table 18 System-level Factors Influencing Respondent’s Voting in Most Recent Presidential Election<sup>a</sup>**

|                                          | <b>B</b> | <b>Significance</b> | <b>Exp(B)</b> |
|------------------------------------------|----------|---------------------|---------------|
| Percent living in urban areas            | .002     | .003                | 1.002         |
| Percent indigenous population            | .002     | .175                | 1.002         |
| Percent unemployed                       | .008     | .137                | 1.008         |
| Human Development Index 2009             | .118     | .780                | 1.125         |
| Freedom House (inverted) democracy score | .120     | .000                | 1.127         |
| Age of democratic regime in 2010         | -.009    | .000                | .991          |
| Public education expenditure as % of GDP | -.102    | .000                | .903          |
| Health expenditure as % of GDP           | .017     | .208                | 1.017         |
| Language fractionalization index         | -.056    | .566                | .946          |
| Ethnicity fractionalization index        | 1.699    | .000                | 5.466         |
| Religion fractionalization index         | .238     | .209                | 1.268         |
| Constant                                 | -.653    | .003                | .521          |

<sup>a</sup> The regression model is logistic regression for a binomial variable (voted/did not vote).

Dummy variables for 17 study countries were included in the model (Costa Rica was excluded), but are omitted from this presentation to here to conserve space. The information in the Significance (Sig.) and Probability of B [Exp(B)] columns provides evidence for influence on the dependent variable. A significance smaller than  $|.01|$  indicates significant influence for this large sample size. The absolute value of the relative size of the Exp(B) coefficient above or below 1.000 indicates the strength of expectation that this independent variable’s influences voting. For example, an Exp(B) for variable X of 1.400 suggests a 1.4 (40 percent) probability of positive influence, a value of 1.000 indicates no influence, and a value of .800 suggesting a 0.2 (20 percent) probability of negative influence. Significant relationships are indicated by gray cells.

*Sources:* Economic Commission for Latin America and the Caribbean,

[http://estadisticas.cepal.org/cepalstat/WEB\\_CEPALSTAT/estadisticasIndicadores.asp?idioma=](http://estadisticas.cepal.org/cepalstat/WEB_CEPALSTAT/estadisticasIndicadores.asp?idioma=)

i; United Nations Development Programme, Human Development Index Trends,

<https://data.undp.org/dataset/Table-2-Human-Development-Index-trends/efc4-gjvq>; Appendix

1.1; Appendix 1.2; Alberto Alesina and James Fearon (2005). "Ethnic Diversity and Economic Performance," *Journal of Economic Literature*: 762–800.

**Table 19 Individual Level Factors Influencing Contacting Public Officials, Party and Campaign activism, and Protest<sup>a</sup>**

|                                                         | <b>Contacting Public Officials</b> | <b>Party and Campaign Activism</b> | <b>Protest</b> |
|---------------------------------------------------------|------------------------------------|------------------------------------|----------------|
| (Constant)                                              | 3.845                              | .820                               | 1.006          |
| Sex                                                     | -1.129                             | -8.043                             | -2.555         |
| How old are you?                                        | 4.214                              | 4.343                              | 1.102          |
| How many years of schooling have you completed?         | 1.710                              | 4.351                              | 3.190          |
| Standard of living based on household artifacts         | -6.272                             | -.335                              | -.123          |
| Interest in politics                                    | 14.345                             | 42.431                             | 18.559         |
| Level of political knowledge                            | -2.554                             | -.192                              | -1.121         |
| Frequency of paying attention to news                   | 3.225                              | .619                               | 1.055          |
| Frequency of internet use                               | 1.991                              | 3.078                              | 5.883          |
| Worked to solve community problem                       | 19.162                             | 11.398                             | 6.217          |
| Committee for community improvements                    | 20.542                             | 16.669                             | 9.992          |
| Attended religious group                                | 3.697                              | -.061                              | -.859          |
| Attended Parents Association                            | 8.434                              | 5.027                              | 2.068          |
| Attended professional/ business/producers meetings      | 13.669                             | 13.115                             | 7.082          |
| Attended women's group meetings                         | 6.708                              | 5.616                              | 3.155          |
| Perception of government economic performance           | 3.609                              | 5.155                              | .040           |
| Perception of national economic situation               | -1.405                             | 3.455                              | -2.050         |
| Perception of personal economic situation               | -4.183                             | -2.434                             | -1.390         |
| Perception of family economic situation                 | -4.310                             | -3.482                             | -.237          |
| Number of ways victimized by corruption in past year    | 11.152                             | 9.641                              | 9.569          |
| Perception of insecurity                                | 1.928                              | 1.233                              | 1.978          |
| Number of children living with respondent               | 1.023                              | .654                               | -.381          |
| Catholic religious affiliation                          | -.034                              | .236                               | -6.750         |
| Protestant-Evangelical                                  | .700                               | .715                               | -4.944         |
| Respondent's skin color (1=very light... 11 =very dark) | .575                               | 2.247                              | 1.813          |
| White Race                                              | -.239                              | .143                               | -1.588         |
| Black race/mulatto/"moreno"                             | .986                               | 1.042                              | .430           |
| Indigenous race                                         | 2.113                              | -.914                              | 5.519          |

<sup>a</sup> Country dummies were included in these models to screen out local effects, but are excluded from the presentation to save space.

<sup>b</sup> Cell values are T-ratios. T-ratios indicate increased strength of independent association between the dependent variable and explanatory variable, other variables influence held constant, by having greater absolute numerical values. A significant t-ratio at the .01 (1 in 100) level of probability has an absolute value greater than or equal to 2.6. We use this criterion of significance rather than the usual because the very large pooled sample size tends to give high significance values to weak associations when using the .05 criterion. The coefficients' signs indicate the direction of association (slope of the regression line between the dependent variable and the explanatory variable -- one increases as the other decreases).

*Source:* AmericasBarometer 2010 surveys; [www.LapopSurveys.org](http://www.LapopSurveys.org).



**Table 20 Regression Models for System (Country)-level Influences on Contacting Public Officials, Party and Campaign activism, and Protest<sup>a</sup>**

| <b>Variables</b>                            | <b>Contactin<br/>g Public<br/>Officials</b> | <b>Party and<br/>campaign<br/>activism</b> | <b>Protest</b> |
|---------------------------------------------|---------------------------------------------|--------------------------------------------|----------------|
| Constant                                    | 6.980                                       | 12.395                                     | 6.049          |
| Percent living in urban areas               | -4.048                                      | 2.302                                      | 4.759          |
| Percent indigenous population               | 9.192                                       | -4.920                                     | 2.744          |
| Percent unemployed                          | .854                                        | 9.009                                      | -1.799         |
| Human Development Index 2009                | 2.784                                       | -7.115                                     | -3.200         |
| Freedom House democracy index inverted 2009 | -3.853                                      | 5.459                                      | 1.047          |
| Age of democratic regime as of 2010         | 5.796                                       | 4.963                                      | -.122          |
| Public education expenditure as % of GDP    | -.156                                       | -.017                                      | -3.016         |
| Health expenditure as % of GDP              | -6.637                                      | -2.781                                     | 2.310          |
| Language fractionalization index            | -4.248                                      | .121                                       | 2.954          |
| Ethnicity fractionalization index           | -5.392                                      | 3.078                                      | -1.083         |
| Religious fractionalization index           | 3.360                                       | -3.676                                     | -3.624         |

<sup>a</sup> Cell values are T-ratios. T-ratios indicate increased strength of independent association between the dependent variable and explanatory variable, other variables influence held constant, by having greater absolute numerical values. Because aggregate variables tend to inflate t-ratios, we will consider only t-ratios greater than |5.0| as indicating significant relationships. The coefficients' signs indicate the direction of association (slope of the regression line between the dependent variable and the explanatory variable -- one increases as the other decreases).

*Source:* AmericasBarometer 2010 surveys; [www.LapopSurveys.org](http://www.LapopSurveys.org).

**Figure 5 Ethnic-Racial Identities (Self-determined) by Country**

[Use the data noted in the graph below to replicate the chart.]

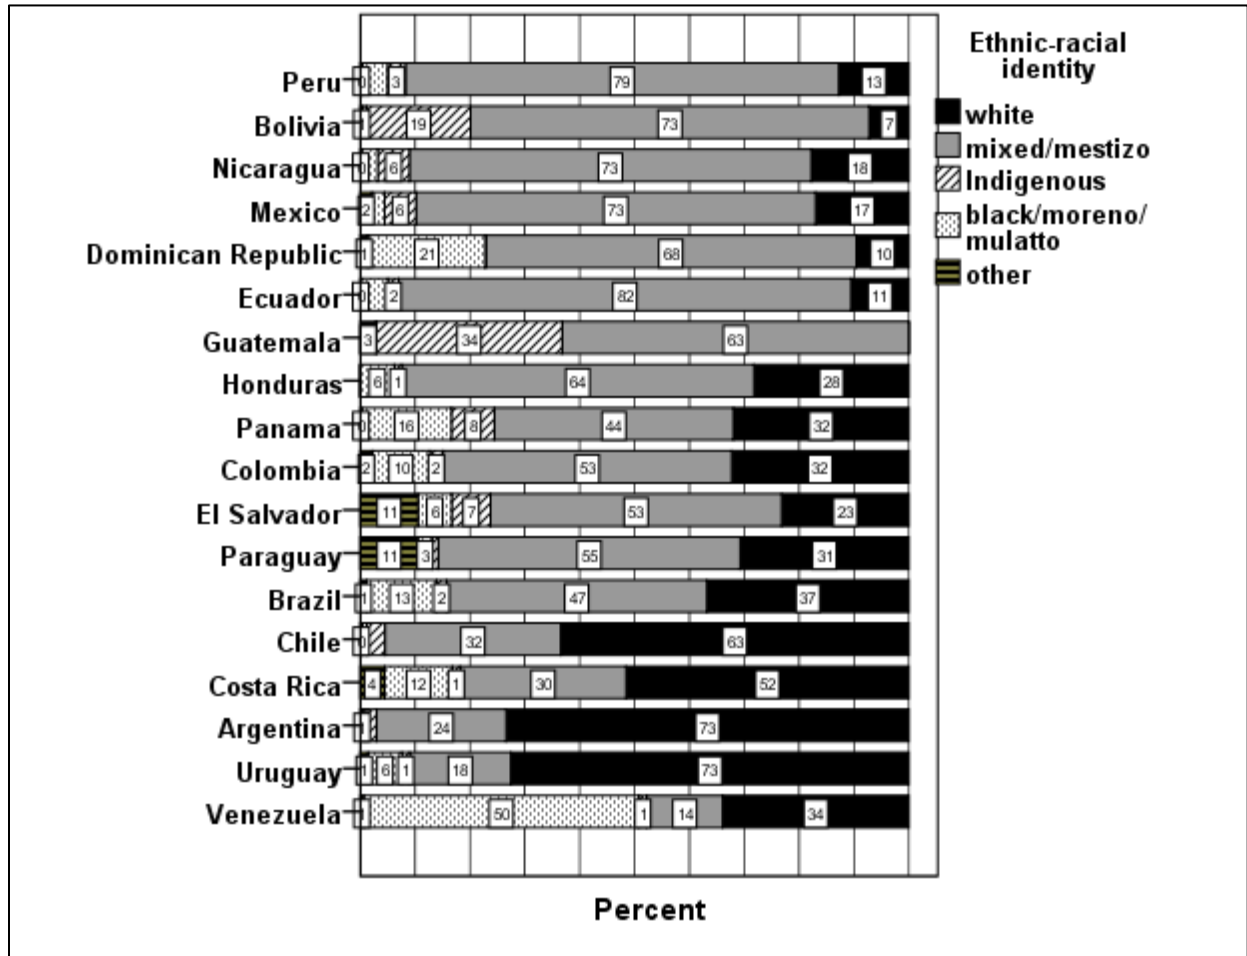

*Note:* Cases weighted for equal number per country.

*Source:* AmericasBarometer 2010 surveys; [www.LapopSurveys.org](http://www.LapopSurveys.org).

**Table 2 Cultural Norms by National Percent of Self-identified Indigenous Populations**

| Variables                                                 | Percent of Self-identified Indigenous Population |          |           |        | Region | Sig. <sup>a</sup> |
|-----------------------------------------------------------|--------------------------------------------------|----------|-----------|--------|--------|-------------------|
|                                                           | 0 to 2 %                                         | 2 to 4 % | 4 to 18 % | 18 % + |        |                   |
| Democratic attitudes syndrome index                       | 67.5                                             | 67.2     | 60.4      | 60.4   | 65.0   | ***               |
| Authoritarian attitudes syndrome index                    | 23.7                                             | 22.9     | 25.0      | 25.4   | 24.1   | ***               |
| Support for the rule of law                               | 59.6                                             | 60.7     | 53.3      | 63.3   | 58.6   | ***               |
| Support for citizens taking the law into their own hands  | 28.8                                             | 27.8     | 37.5      | 33.3   | 31.2   | ***               |
| Support for armed rebellion against an elected government | 13.5                                             | 16.7     | 18.3      | 17.7   | 15.4   | ***               |
| Populist attitudes index                                  | 34.7                                             | 34.5     | 39.2      | 38.7   | 36.2   | ***               |
| Diffuse support for polity                                | 54.4                                             | 54.4     | 54.5      | 55.2   | 54.5   | ***               |
| Perceived discrimination <sup>c</sup>                     | 9.7                                              | 13.7     | 11.1      | 16.9   | 11.7   | ***               |
| Economic racism <sup>d</sup>                              | 19.1                                             | 22.5     | 16.9      | 25.0   | 20.4   | ***               |
| Discriminatory attitudes <sup>e</sup>                     | 5.8                                              | 6.7      | 7.2       | 10.5   | 7.0    | ***               |
| Number of respondents <sup>f</sup>                        | 14,406                                           | 3,380    | 6,675     | 2,539  | 27,000 |                   |

<sup>a</sup> Statistical significance levels: \*=.05, \*\* = .01, \*\*\*=.001, NS=not significantly different.

Substantive significance (difference across means of five scale points out of 100) indicated by cells shaded in gray.

<sup>b</sup> Base sample size approximately 750 per country on this item (from 2012 surveys).

<sup>c</sup> From 2012 surveys; only from Paraguay, Bolivia, Mexico, Colombia, Costa Rica, Argentina, Brazil.

<sup>d</sup> From 2012 surveys; all countries included.

<sup>e</sup> From 2012 surveys; includes Bolivia, Colombia.

<sup>f</sup> Number varies slightly by variable due to differing numbers of missing cases; normal sample =1,500 per country for all items unless otherwise indicated.

Source: AmericasBarometer 2010 surveys and 2012 surveys; www.LapopSurveys.org.

**Figure 6 Mean Skin Color by Self-defined Ethnic-Racial Identity in Latin America, 2010**

[Use the data provided to create a bar chart like the one shown below.]

**Report**

| ethnic-racial identity | Color of the face of the respondent |
|------------------------|-------------------------------------|
| white                  | 3.44                                |
| Mixed                  | 4.65                                |
| Indigenous             | 5.41                                |
| black/moreno/mulatto   | 6.31                                |
| other                  | 5.51                                |
| Total                  | 4.49                                |

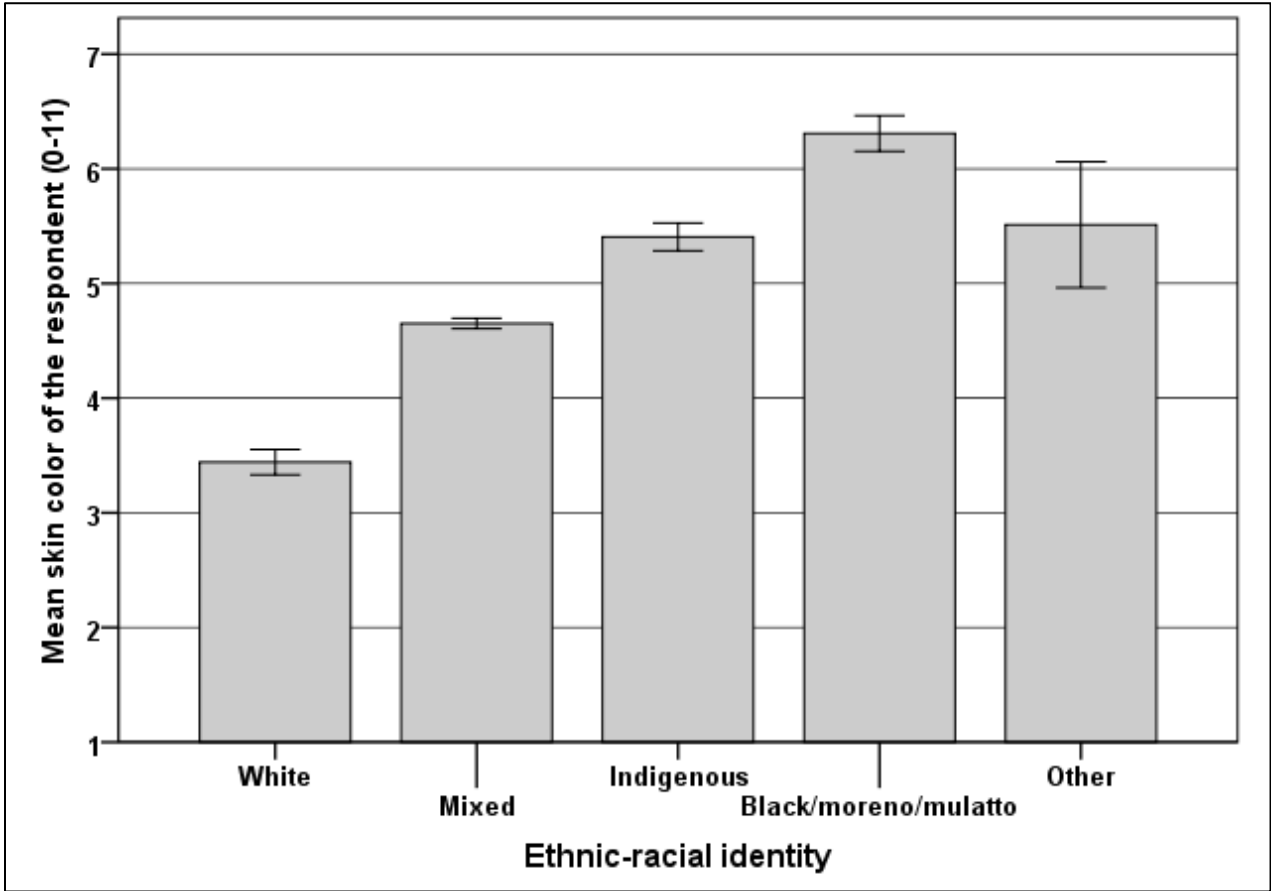

Notes: Error bars: 95% CI.

Cases weighted for equal size per country.

*Source:* AmericasBarometer 2010 surveys: [www.LapopSurveys.org](http://www.LapopSurveys.org).

**Figure 7 Discriminatory Attitudes toward Others, 2012**

**[Use the data provided to create a bar chart similar to the one shown below.]**

**Report**

Mean

| País       | discriminatory attitudes excluding gays | discriminatory attitudes toward others |
|------------|-----------------------------------------|----------------------------------------|
| México     | 4.5283                                  | 7.3251                                 |
| Nicaragua  | 11.7377                                 | 17.7375                                |
| Costa Rica | 3.1215                                  | 5.8244                                 |
| Colombia   | 3.4986                                  | 7.0301                                 |
| Bolivia    | 5.5378                                  | 11.1218                                |
| Paraguay   | 5.1640                                  | 12.5122                                |
| Uruguay    | 1.9260                                  | 3.0442                                 |
| Brasil     | 2.7147                                  | 3.8785                                 |
| Argentina  | 3.4722                                  | 5.3996                                 |
| Rep. Dom.  | 4.1971                                  | 12.5527                                |
| Total      | 4.5861                                  | 8.6362                                 |

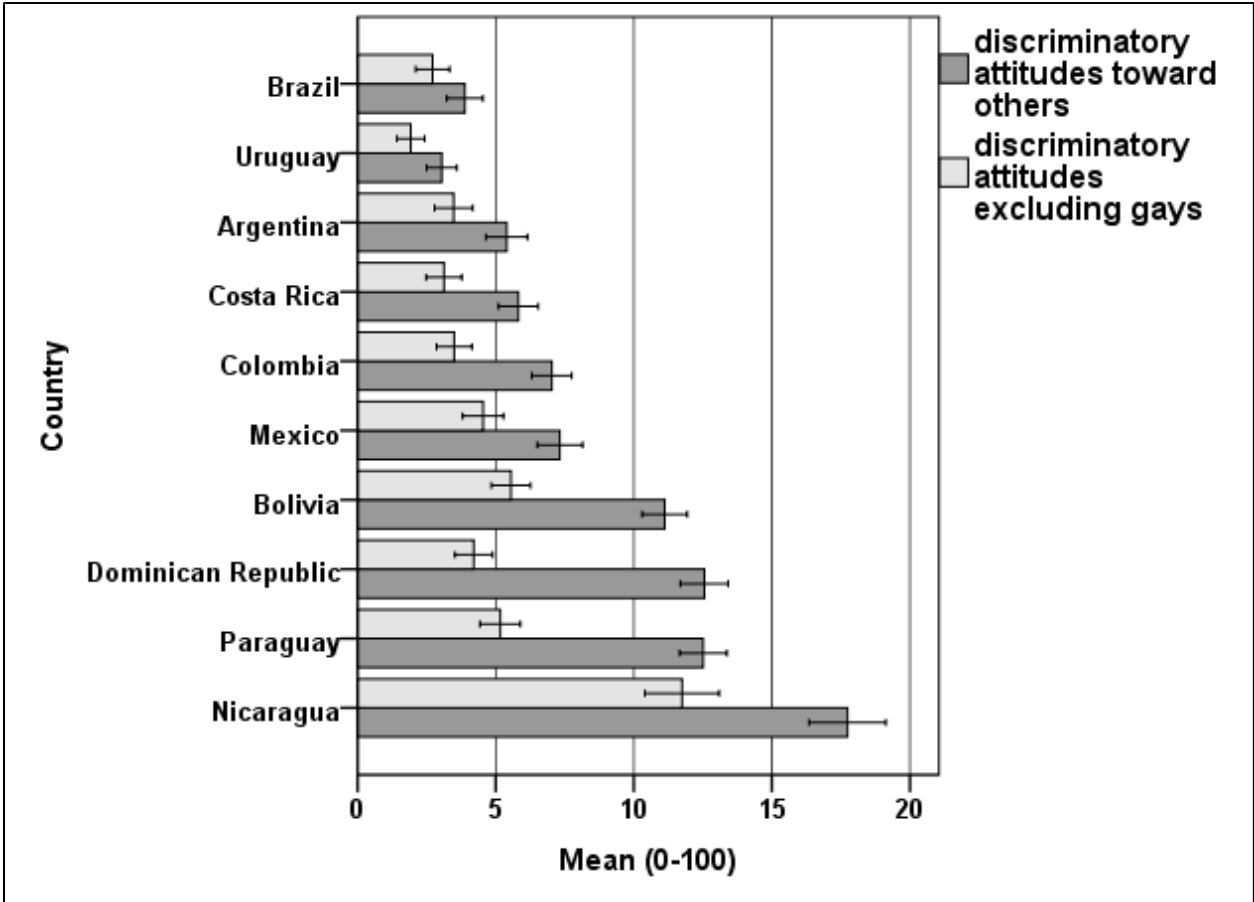

Notes: Error bars: 95% CI.

Cases weighted for equal size per country.

Source: AmericasBarometer 2012 surveys; [www.LapopSurveys.org](http://www.LapopSurveys.org).

**Table 22 Regression Model (Ordinary Least Squares) of Support for the Rule of Law (Police Following the Law) and Support for Citizens Taking the Law into Their Own Hands (Vigilantism) in 18 Latin American Countries**

|                                                                  | Support for the Rule of Law |      | Support for Vigilantism |      |
|------------------------------------------------------------------|-----------------------------|------|-------------------------|------|
|                                                                  | T <sup>a</sup>              | Sig. | T <sup>a</sup>          | Sig. |
| (Constant)                                                       | 34.971                      | .000 | 38.418                  | .000 |
| Sex (male=1, female =2)                                          | 7.480                       | .000 | -4.689                  | .000 |
| Educational attainment                                           | -.536                       | .592 | -5.931                  | .000 |
| Household living standard                                        | -1.656                      | .098 | -13.098                 | .000 |
| Age                                                              | 8.174                       | .000 | -16.724                 | .000 |
| Indigenous                                                       | 2.698                       | .007 | 7.347                   | .000 |
| Black                                                            | 3.626                       | .000 | .301                    | .764 |
| Believe the police are involved in crime                         | -11.411                     | .000 | 12.633                  | .000 |
| Perceived insecurity in one's neighborhood                       | -6.891                      | .000 | 9.674                   | .000 |
| Self or member of household victimized by crime within last year | -6.311                      | .000 | 6.175                   | .000 |

<sup>a</sup> Cell values are T-ratios. T-ratios indicate increased strength of independent association between the dependent variable and explanatory variable, other variables influence held constant, by having greater absolute numerical values. A significant t-ratio at the .01 (1 in 100) level of probability has an absolute value greater than or equal to 2.6. We use this criterion of significance rather than the usual because the very large pooled sample size tends to give high significance values to weak associations when using the .05 criterion. The coefficients' signs indicate the direction of association (slope of the regression line between the dependent variable and the explanatory variable -- one increases as the other decreases).

*Source:* AmericasBarometer 2010 surveys; [www.LapopSurveys.org](http://www.LapopSurveys.org).



**Figure 8 Mean Household Living Standard by Economic Stratum by Country**

**[Use the data provided to create a line graph similar to the one shown below.]**

**Report**

standard of living based on household artifacts

| Country     | Economic class | Mean    | N    | Std. Deviation |
|-------------|----------------|---------|------|----------------|
| Mexico      | working        | 3.7824  | 459  | 1.24169        |
|             | lower middle   | 6.5000  | 386  | .50065         |
|             | upper middle   | 8.4224  | 309  | .49474         |
|             | upper          | 11.2833 | 346  | 1.20023        |
|             | Total          | 7.1671  | 1500 | 2.96183        |
| Guatemala   | working        | 1.8514  | 450  | 1.03607        |
|             | lower middle   | 4.5296  | 388  | .49977         |
|             | upper middle   | 6.8615  | 360  | .80808         |
|             | upper          | 10.8020 | 302  | 1.61750        |
|             | Total          | 5.5499  | 1500 | 3.37876        |
| El Salvador | working        | 2.2754  | 390  | .85293         |
|             | lower middle   | 4.5442  | 416  | .49864         |
|             | upper middle   | 6.7708  | 431  | .80628         |
|             | upper          | 10.4669 | 263  | 1.30816        |
|             | Total          | 5.6329  | 1500 | 2.91214        |
| Honduras    | working        | 1.2861  | 358  | .78448         |
|             | lower middle   | 4.0396  | 593  | .82236         |
|             | upper middle   | 6.4555  | 264  | .49896         |
|             | upper          | 9.7888  | 285  | 1.66246        |
|             | Total          | 4.8991  | 1500 | 3.05943        |
| Nicaragua   | working        | 1.2212  | 440  | .81545         |
|             | lower middle   | 3.4762  | 450  | .49999         |
|             | upper middle   | 5.4215  | 317  | .49459         |
|             | upper          | 8.6279  | 293  | 1.67173        |
|             | Total          | 4.2318  | 1500 | 2.78892        |
| Costa Rica  | working        | 4.8602  | 372  | 1.29350        |
|             | lower middle   | 7.5020  | 500  | .50050         |
|             | upper middle   | 9.4194  | 341  | .49418         |
|             | upper          | 11.7352 | 287  | .90429         |
|             | Total          | 8.0927  | 1500 | 2.52170        |
| Panama      | working        | 3.2227  | 438  | 1.65952        |

|          |              |         |      |         |
|----------|--------------|---------|------|---------|
|          | lower middle | 6.4914  | 397  | .50056  |
|          | upper middle | 8.4233  | 318  | .49486  |
|          | upper        | 11.1130 | 346  | 1.06117 |
|          | Total        | 7.0111  | 1500 | 3.12321 |
| Colombia | working      | 3.2085  | 354  | .98660  |
|          | lower middle | 5.4747  | 472  | .49989  |
|          | upper middle | 7.8588  | 423  | .82349  |
|          | upper        | 11.2262 | 251  | 1.11511 |
|          | Total        | 6.5757  | 1500 | 2.80151 |
| Ecuador  | working      | 3.1287  | 328  | .98659  |
|          | lower middle | 5.4805  | 474  | .50015  |
|          | upper middle | 7.4069  | 348  | .49197  |
|          | upper        | 10.1673 | 350  | 1.15335 |
|          | Total        | 6.5067  | 1500 | 2.60887 |
| Bolivia  | working      | 2.1869  | 373  | .90399  |
|          | lower middle | 4.5092  | 562  | .50036  |
|          | upper middle | 6.0000  | 216  | .00000  |
|          | upper        | 8.5612  | 350  | 1.71107 |
|          | Total        | 5.0918  | 1500 | 2.47572 |
| Peru     | working      | 2.9630  | 513  | 1.12178 |
|          | lower middle | 5.4700  | 400  | .49972  |
|          | upper middle | 7.4216  | 268  | .49475  |
|          | upper        | 10.4702 | 319  | 1.23047 |
|          | Total        | 6.0247  | 1500 | 2.95057 |
| Paraguay | working      | 3.0237  | 378  | 1.16245 |
|          | lower middle | 5.5463  | 442  | .49842  |
|          | upper middle | 7.4441  | 349  | .49758  |
|          | upper        | 10.5408 | 331  | 1.49565 |
|          | Total        | 6.4514  | 1500 | 2.84393 |
| Chile    | working      | 5.9393  | 533  | 1.16274 |
|          | lower middle | 8.4542  | 362  | .49859  |
|          | upper middle | 10.4883 | 382  | .50052  |
|          | upper        | 12.4460 | 224  | .74614  |
|          | Total        | 8.6730  | 1500 | 2.51347 |
| Uruguay  | working      | 5.2085  | 398  | 1.04036 |
|          | lower middle | 7.9751  | 562  | .80290  |
|          | upper middle | 10.0000 | 203  | .00000  |
|          | upper        | 11.6409 | 337  | .82656  |

|                    |              |         |       |         |
|--------------------|--------------|---------|-------|---------|
|                    | Total        | 8.3387  | 1500  | 2.48141 |
| Brazil             | working      | 4.1423  | 361   | 1.20000 |
|                    | lower middle | 6.8677  | 549   | .79496  |
|                    | upper middle | 9.4797  | 297   | .50043  |
|                    | upper        | 11.8281 | 293   | .94484  |
|                    | Total        | 7.7003  | 1500  | 2.83966 |
| Venezuela          | working      | 5.0700  | 414   | 1.05877 |
|                    | lower middle | 7.4687  | 399   | .49964  |
|                    | upper middle | 9.4856  | 348   | .50051  |
|                    | upper        | 11.7345 | 339   | .91358  |
|                    | Total        | 8.2387  | 1500  | 2.58395 |
| Argentina          | working      | 5.0701  | 455   | 1.18718 |
|                    | lower middle | 7.4912  | 362   | .50061  |
|                    | upper middle | 9.4906  | 340   | .50065  |
|                    | upper        | 11.7609 | 343   | .87282  |
|                    | Total        | 8.1851  | 1500  | 2.66277 |
| Dominican Republic | working      | 2.8146  | 437   | 1.21722 |
|                    | lower middle | 5.5433  | 462   | .49866  |
|                    | upper middle | 7.4177  | 328   | .49393  |
|                    | upper        | 10.4139 | 273   | 1.44536 |
|                    | Total        | 6.0447  | 1500  | 2.81921 |
| Total              | working      | 3.4472  | 7451  | 1.78401 |
|                    | lower middle | 5.9154  | 8176  | 1.52874 |
|                    | upper middle | 8.0288  | 5842  | 1.49961 |
|                    | upper        | 10.7886 | 5531  | 1.62310 |
|                    | Total        | 6.6897  | 27000 | 3.08627 |

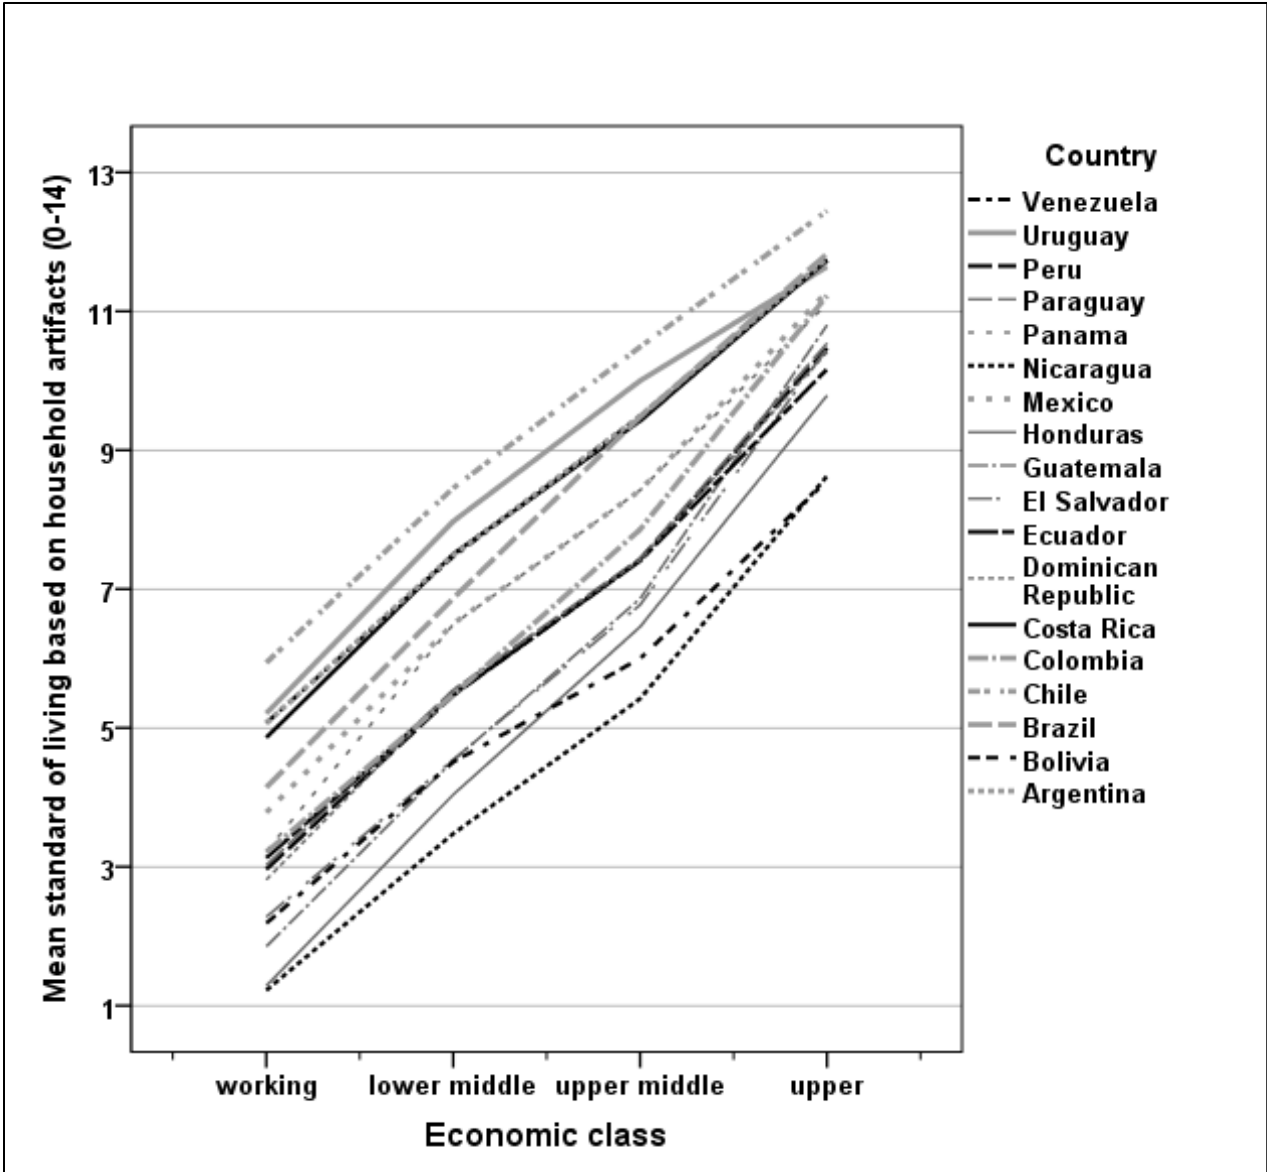

Note: Cases weighted for equal size per country.

Source: AmericasBarometer 2010 surveys; [www.LapopSurveys.org](http://www.LapopSurveys.org).

**Figure 9 Authoritarian and Confrontational Norms in Latin America**

**[Use the data provided to create a bar chart similar to the one shown below.]**

Mean

| Country            | support for<br>confrontational<br>methods | authoritarian<br>norms |
|--------------------|-------------------------------------------|------------------------|
| Mexico             | 21.7605                                   | 29.2366                |
| Guatemala          | 26.8776                                   | 30.8437                |
| El Salvador        | 24.1888                                   | 26.6964                |
| Honduras           | 27.9803                                   | 21.0929                |
| Nicaragua          | 22.3509                                   | 20.3872                |
| Costa Rica         | 20.9110                                   | 21.2315                |
| Panama             | 23.8330                                   | 18.4999                |
| Colombia           | 25.0635                                   | 22.3324                |
| Ecuador            | 24.9570                                   | 24.4584                |
| Bolivia            | 23.1550                                   | 21.4440                |
| Peru               | 24.6274                                   | 32.0480                |
| Paraguay           | 17.9394                                   | 31.0334                |
| Chile              | 20.7661                                   | 18.9173                |
| Uruguay            | 18.4448                                   | 17.8840                |
| Brazil             | 20.0349                                   | 21.7276                |
| Venezuela          | 24.9630                                   | 17.0040                |
| Argentina          | 25.0336                                   | 15.0918                |
| Dominican Republic | 22.0081                                   | 25.7863                |
| Total              | 23.0506                                   | 23.0808                |

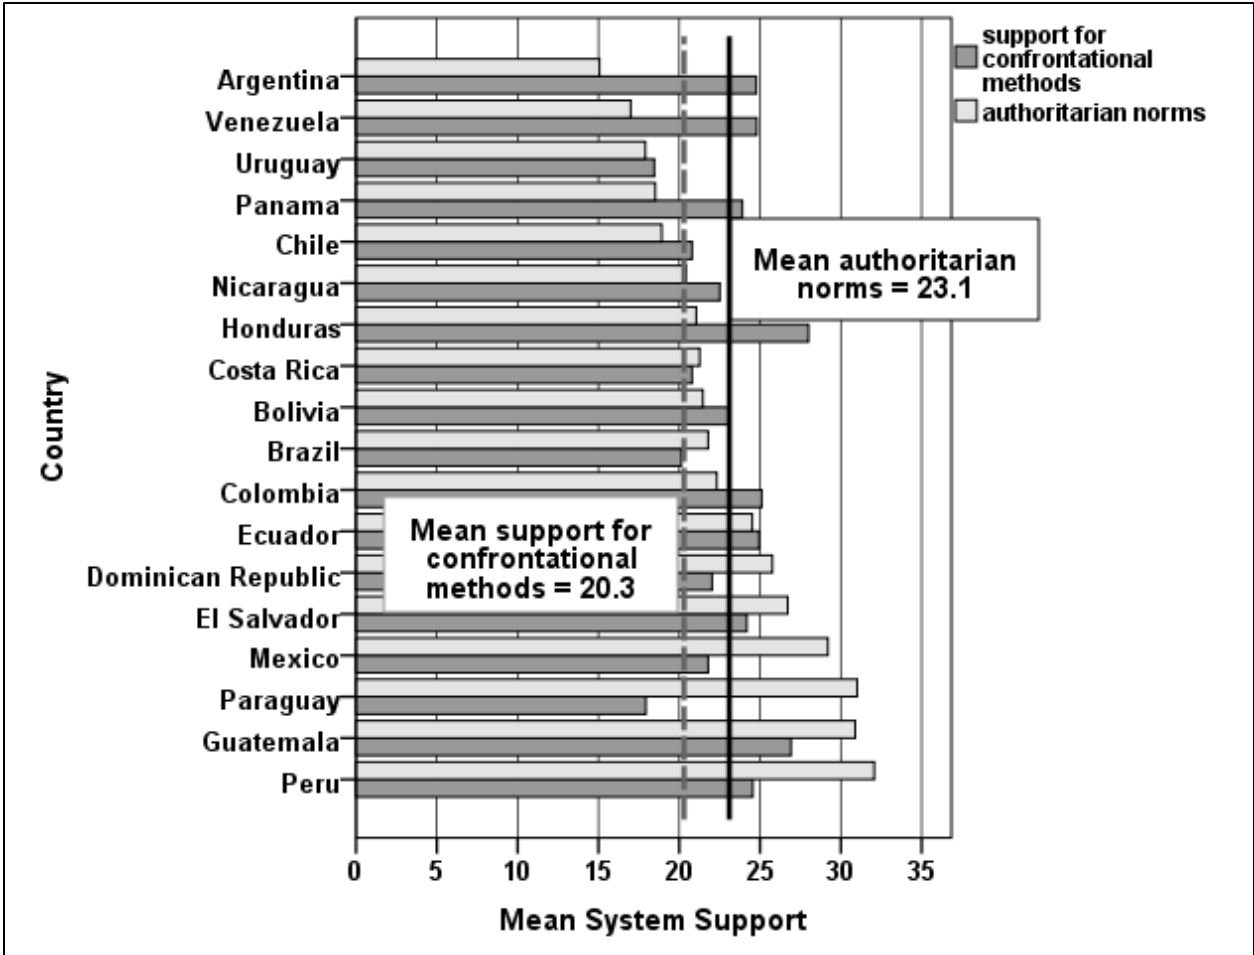

Note: Cases weighted for equal size per country.

Source: AmericasBarometer 2010 surveys; [www.LapopSurveys.org](http://www.LapopSurveys.org).
